# Supplementary material for: Home self-administration of intravenous antibiotics as part of an outpatient parenteral antibiotic therapy service: a qualitative study of the perspectives of patients who do not self-administer
Source: PubMed Central journal article supplement — BMJ Open. 2019 Jan 25;9(1):e027475. doi: 10.1136/bmjopen-2018-027475 (PMC6347967; doi:10.1136/bmjopen-2018-027475), 2019-01-25
Supplement: bmjopen-2018-027475.draft_revisions.pdf [file bmjopen-2018-027475.draft_revisions.pdf]

# BMJ Open

BMJ Open is committed to open peer review. As part of this commitment we make the peer review history of every article we publish publicly available.

When an article is published we post the peer reviewers' comments and the authors' responses online. We also post the versions of the paper that were used during peer review. These are the versions that the peer review comments apply to.

The versions of the paper that follow are the versions that were submitted during the peer review process. They are not the versions of record or the final published versions. They should not be cited or distributed as the published version of this manuscript.

BMJ Open is an open access journal and the full, final, typeset and author-corrected version of record of the manuscript is available on our site with no access controls, subscription charges or pay-per-view fees (<http://bmjopen.bmj.com>).

If you have any questions on BMJ Open's open peer review process please email [info.bmjopen@bmj.com](mailto:info.bmjopen@bmj.com)

# BMJ Open

## Home self-administration of intravenous antibiotics as part of an outpatient parenteral antibiotic therapy service: A qualitative study of the perspectives of patients who do not self-administer

|                               |                                                                                                                                                                                                                                                                                                                                                                                                                                                                                                                                                                                                                                                                                      |
|-------------------------------|--------------------------------------------------------------------------------------------------------------------------------------------------------------------------------------------------------------------------------------------------------------------------------------------------------------------------------------------------------------------------------------------------------------------------------------------------------------------------------------------------------------------------------------------------------------------------------------------------------------------------------------------------------------------------------------|
| Journal:                      | <i>BMJ Open</i>                                                                                                                                                                                                                                                                                                                                                                                                                                                                                                                                                                                                                                                                      |
| Manuscript ID                 | bmjopen-2018-027475                                                                                                                                                                                                                                                                                                                                                                                                                                                                                                                                                                                                                                                                  |
| Article Type:                 | Research                                                                                                                                                                                                                                                                                                                                                                                                                                                                                                                                                                                                                                                                             |
| Date Submitted by the Author: | 29-Oct-2018                                                                                                                                                                                                                                                                                                                                                                                                                                                                                                                                                                                                                                                                          |
| Complete List of Authors:     | Tonna, Antonella; Robert Gordon University, Anthony, Geraldine; Robert Gordon University<br>Tonna, Ivan; Aberdeen Royal Infirmary Infectious Diseases<br>Paudyal, Vibhu; University of Birmingham, Centre of Academic Primary Care<br>Forbes-McKay, Katrina; Robert Gordon University, School of Applied Social Studies<br>Laing, Rob; Aberdeen Royal Infirmary Infectious Diseases<br>Mckenzie, Alexander; Aberdeen Royal Infirmary Infectious Diseases<br>Falconer, Sharon; Aberdeen Royal Infirmary Infectious Diseases<br>McCartney, Gillian; Aberdeen Royal Infirmary Infectious Diseases<br>Stewart, Derek; The Robert Gordon University, School of Pharmacy and Life Sciences |
| Keywords:                     | QUALITATIVE RESEARCH, OPAT, behaviours                                                                                                                                                                                                                                                                                                                                                                                                                                                                                                                                                                                                                                               |
|                               |                                                                                                                                                                                                                                                                                                                                                                                                                                                                                                                                                                                                                                                                                      |

SCHOLARONE™  
Manuscripts

1  
2  
3  
4  
5  
6  
7  
8  
9  
10  
11  
12

# Home self-administration of intravenous antibiotics as part of an outpatient parenteral antibiotic therapy service: A qualitative study of the perspectives of patients who do not self-administer

13  
14

## Corresponding Author:

15 Dr Antonella Tonna BPharm (Hons), MSc, PhD

16 Lecturer in Clinical Pharmacy

17 School of Pharmacy and Life Sciences

18 Robert Gordon University

19 Sir Ian Wood Building

20 Garthdee Road

21 Aberdeen AB10 7GJ

22 [a.tonna@rgu.ac.uk](mailto:a.tonna@rgu.ac.uk)

23 Tel: 07776286038

24  
25  
26  
27  
28  
29  
30  
31  
32  
33  
34  
35  
36  
37 Dr Geraldine Anthony PhD, MSc, BSc

38 Research Fellow

39 School of Pharmacy and Life Sciences

40 Robert Gordon University

41 Riverside East

42 Garthdee Road

43 Aberdeen AB10 7GJ

*OPAT- perspectives of patient who do not self-administer*

1  
2  
3 Dr Ivan Tonna MD, MCRP (UK), MSc, FRCP (Edin(  
4

5 Consultant Physician  
6

7 Ward 111  
8

9 Aberdeen Royal Infirmary  
10

11 Foresterhill  
12

13 Aberdeen AB25 2ZN  
14  
15

16  
17 Dr Vibhu Paudyal BPharm, MSc, PhD

18 Senior Lecturer in Clinical Pharmacy

19 School of Pharmacy  
20

21 University of Birmingham  
22

23 Edgbaston, Birmingham  
24

25 B15 2TT  
26  
27

28  
29  
30 Dr Katrina Forbes-McKay MA (Hons), PhD

31 Lecturer in Psychology  
32

33 School of Applied Social Studies  
34

35 Robert Gordon University  
36

37 Riverside East  
38

39 Garthdee Road  
40

41 Aberdeen AB10 7GJ  
42  
43  
44

45  
46 Dr Rob Laing MBChB, MD, MRCP (UK), FRCP (Edin)

47 Consultant Physician  
48

49 Ward 111  
50

51 Aberdeen Royal Infirmary  
52

53 Foresterhill  
54

55 Aberdeen AB25 2ZN  
56  
57  
58  
59  
60

*OPAT- perspectives of patient who do not self-administer*

1  
2  
3 Dr Alexander McKenzie BMedBiol, MBChB, DTM&H, FRCP

4  
5 Consultant Physician

6  
7 Ward 111

8  
9 Aberdeen Royal Infirmary

10  
11 Foresterhill

12  
13 Aberdeen AB25 2ZN

14  
15  
16  
17 Mrs Sharon Falconer RCN, NMC

18  
19 OPAT Nurse

20  
21 Consultant Physician

22  
23 Ward 111

24  
25 Aberdeen Royal Infirmary

26  
27 Foresterhill

28  
29 Aberdeen AB25 2ZN

30  
31  
32 Mrs Gillian McCartney BSc, MSc

33  
34 Specialist antimicrobial pharmacist

35  
36 Ward 111

37  
38 Aberdeen Royal Infirmary

39  
40 Foresterhill

41  
42 Aberdeen AB25 2ZN

43  
44  
45  
46 Prof Derek Stewart BSc, MSc, PhD

47  
48 Professor of Pharmacy Practice

49  
50 School of Pharmacy And Life Sciences

51  
52 Robert Gordon University

53  
54 Sir Ian Wood Building

55  
56 Garthdee Road

57  
58 Aberdeen AB10 7GJ

*OPAT- perspectives of patient who do not self-administer***Abstract****Objectives**

This study aimed to use a theoretical approach to understand the determinants of behaviour in patients not home self-administering antibiotics.

**Setting**

Outpatient care: Included patients were attending an outpatient clinic for IV antibiotic administration in the North-East of Scotland

**Participants**

Patients were included if they had received more than seven days of antibiotics, and were aged 16 years and over. Twenty potential participants were approached and all agreed to be interviewed. 13 were male with a mean age of 54 years (SD 17.6).

**Outcomes**

Key behavioural determinants that influenced patients' behaviours relating to self-administration of IV antibiotics

**Design**

Qualitative, semi-structured in-depth interviews were undertaken with a purposive sample of patients. An interview schedule, underpinned by the Theoretical Domains Framework (TDF), was developed, reviewed for credibility and piloted. Interviews were audio-recorded and transcribed verbatim. Data were analysed thematically using the TDF as the coding framework.

**Results**

The key behavioural determinants emerging as encouraging patients to self-administer were the perceptions of being sufficiently knowledgeable, skilful and competent and that self-administration afforded the potential to work whilst administering treatment. The key determinants that impacted their decision not to self-administer were lack of knowledge of available options, a perception that hospital staff are better trained and anxieties of potential complications.

**Conclusion**

The main strength of this study is the fact that it is underpinned throughout design and analysis by an accepted theoretical framework. A number of interventions are suggested to overcome the barriers identified which are based on evidence based behavioural change techniques. **(250)**

For peer review only

*OPAT- perspectives of patient who do not self-administer*Strengths and limitations of the study

- A theoretical framework was used to underpin the research design and analysis
- It was apparent that data saturation was achieved.
- The research was conducted within one only hospital in the North-East of Scotland; findings are not necessarily transferable to all OPAT clinics in the UK or beyond.
- The study focused solely on patient perspectives and no members of the healthcare team were interviewed.

Funding

This work was supported by an NHS Grampian Endowment Fund (Project number 14/14). The funding body had no involvement with study design.

Transparency decelaration

All authors confirm that there are no conflicts of interest to declare.

Reporting patient and public involvement in research

Patients were not involved in the design of this research.

Key words

OPAT; patient behaviours; qualitative research methods



*OPAT- perspectives of patient who do not self-administer*Introduction

Outpatient parenteral antibiotic therapy (OPAT) is a treatment option in patients who require parenteral antibiotic administration and are clinically well enough not to require an overnight hospital stay.[1] OPAT was first described in the United States (US) in the early 1970s for treatment of infectious exacerbations of cystic fibrosis,[2] and is now an option for management of diverse infections and patient populations. A model of care involves administration of intravenous (IV) antibiotics within the home setting (by a trained patient, carer or, health professional).[2]

The expansion of OPAT worldwide has been driven by factors including: a drive for more cost-effective use of resources; reduced risks of health-care acquired infection; alignment with the philosophy of patient driven care; an aim to achieve high levels of patient acceptability and satisfaction; and improved quality of life. Evidence of these outcomes has been derived from a systematic review of the cost effectiveness of OPAT highlighting OPAT is cost-effective without increasing patient complications. [3] A narrative review of studies concluded that patients prefer home administration allowing continuation of daily activities.[2] Other cohort studies showed no increased risk of developing health-care acquired infections, particularly *Clostridium difficile*. [4-6] Further evidence concluded there are no additional risks of patient home self-administration of antibiotics compared to hospital administration. [2,7-9]

Several organisations have disseminated guidance and consensus practice statements for OPAT, promoting safe and effective care. [2,10] The British Society of Antimicrobial Chemotherapy (BSAC) launched a number of related initiatives including the National Outcomes Registry System (NORS).[11] Audit data from NORS for 2015 are available for ten OPAT centres in England. No OPAT centres in Scotland are registered with NORS.[12]

Within the North-East of Scotland, an OPAT clinic was established in a major teaching hospital in 1999 to deliver and co-ordinate OPAT administration to patients. This includes OPAT self-administration within the home setting or, for those who opt for health professional administration, treatment is given at the teaching hospital clinic or at a local health-care setting. While other centres in Scotland are reporting increased uptake of home self-administration,[5] uptake in this centre has decreased from 53% in 2006 to 15% in 2013 and 24% in 2015.

*OPAT- perspectives of patient who do not self-administer*

[personal communication] There is a need to investigate the low uptake here with a potential to develop and implement a behaviour change intervention to increase home self-administration.

Such behaviour change interventions are likely to be deemed 'complex' since there are '*several interacting components*'. The UK Medical Research Council (MRC) guidance on '*Developing, Implementing and Evaluating Complex Interventions*' suggest a four stage process; the first is intervention development.[13] Consideration of role of cognitive, behavioural and organisational theories in this phase is emphasised; this will generate an intervention with a '*coherent theoretical basis*' which is more likely to be effective and bring about sustained change.[13]

The Theoretical Domains Framework (TDF) is a framework of theories of behaviour change. To overcome the challenge of selecting the most appropriate theory from the vast number available, TDF was developed, aiming to '*... simplify and integrate a plethora of behaviour change theories and make theory more accessible to, and usable by, other disciplines*'. [14] It is organised into 14 overarching domains and has been used increasingly to explore behaviours in various clinical settings.[15]

This study aimed to use a theoretical approach to understand the determinants of behaviour in patients who are not home self-administering antibiotics.

## Method

### *Design*

This was a qualitative study comprising face-to-face semi-structured interviews.

### *Setting*

The study was conducted in an OPAT clinic in a 900 bedded hospital in the North-East of Scotland. Patient flow within this clinic is at Figure 1.

Around 150 patients per year attend the clinic. (Table 1). Duration of antimicrobial therapy varies from a few days to 4-6 weeks depending on the condition.

*OPAT- perspectives of patient who do not self-administer*

**Table 1: Demographics of patients referred for OPAT in 2015 [personal communication]**

|                                     |             |
|-------------------------------------|-------------|
| <b>Number of patients</b>           | <b>147</b>  |
| <b>Number of OPAT episodes</b>      | <b>3790</b> |
| <b>Diagnosis</b>                    |             |
| Skin and soft tissue infection      | 45          |
| Spinal abscess/discitis             | 35          |
| Joint infection                     | 24          |
| Osteomyelitis                       | 19          |
| Bronchiectasis                      | 16          |
| Lyme disease                        | 7           |
| Urinary tract infection             | 1           |
| <b>Administration</b>               |             |
| Administered in clinic              | 76          |
| Administered in community hospital  | 36          |
| Administered by self                | 35          |
| <b>Duration of treatment (days)</b> |             |
| 0-7                                 | 39          |
| 8-14                                | 26          |
| 15-21                               | 15          |
| 22-28                               | 17          |
| ≥28                                 | 50          |

*OPAT- perspectives of patient who do not self-administer**Participant inclusion and exclusion criteria*

Patients were included if they were: found to be suitable for OPAT by clinic OPAT nurse and specialist infectious diseases consultants; requiring intravenous antibiotics for a period exceeding seven days; were not home self-administering IV antibiotics.

Patients were excluded if they: were 16 years or under; deemed by the OPAT nurse as having no capacity to provide informed consent; had limited understanding of English; or had special communication needs as deemed by clinic team.

The sampling was purposive and all patients meeting the inclusion criteria who attended the clinic over the study period were included (Feb–July 2015). An initial sample size of ten was aimed for with sampling then continued until a point of saturation was reached at which no new themes emerged from three consecutive interviews.[16]

*Recruitment*

The OPAT nurse discussed the study with patient face-to-face and provided patients who were interested and meeting the inclusion criteria with a study information pack. Written, informed consent was obtained from all patients who agreed to participate. Participants were allowed to withdraw from the study at any point during the interview and up to 7 days after.

*Development of interview schedule*

The semi-structured interview schedule was based on the 14 domains of TDF, with core questions and probes to allow an in-depth understanding of the determinants relating to their decision to not self-administer.[14] The schedule was reviewed for credibility by members of the research team providing breadth of expertise in medicine, pharmacy, behavioural psychology and research.[17]

Core questions and links to TDF domains are provided in Table 2.

Two pilot interviews were conducted to establish patient understanding of interview questions and duration; no changes were made.

**Table 2: Interview schedule – the questions are underpinned by TDF and all 14 domains were covered in the development of the interview schedule; some questions cover multiple domains [14]**

| TDF Domain                                                                                                                                                       | Relevant question/s                                                                                                                                                                                                                                                                                                                                                  |
|------------------------------------------------------------------------------------------------------------------------------------------------------------------|----------------------------------------------------------------------------------------------------------------------------------------------------------------------------------------------------------------------------------------------------------------------------------------------------------------------------------------------------------------------|
| <b>Knowledge:</b> An awareness of the existence of something                                                                                                     | Can you briefly describe to me why you are on antibiotics?<br>Can you tell me the name of the antibiotic and for how long you have been prescribed this?<br>Can you describe to me the different alternatives that may be used to inject the antibiotics? E.g. coming to the clinic daily                                                                            |
| <b>Skills:</b> An ability or proficiency acquired through practice                                                                                               | Do you feel you have the necessary: <ul style="list-style-type: none"> <li>• Knowledge</li> <li>• Experience</li> <li>• Skills</li> <li>• Confidence</li> </ul> to self-inject at home? If not, why? What would enhance this? E.g. Further training, meeting up with patients who have successfully self-injected, further discussion with health care professionals |
| <b>Social/Professional Role and Identity:</b> A coherent set of behaviours and displayed personal qualities of an individual in a social or work setting         | Is injecting of antibiotics only a nurse or a doctors' role? Why? Is there a role for others such as patients, relatives, carers to inject at home? Why?                                                                                                                                                                                                             |
| <b>Beliefs about Capabilities:</b> Acceptance of the truth, reality, or validity about an ability, talent, or facility that a person can put to constructive use | Do you feel you have the necessary: <ul style="list-style-type: none"> <li>• Knowledge</li> <li>• Experience</li> <li>• Skills</li> <li>• Confidence</li> </ul> to self-inject at home? If not, why? What would enhance this? Eg. Further training, meeting up with patients who have successfully self-injected, further discussion with health care professionals  |

*OPAT- perspectives of patient who do not self-administer*

|                                                                                                                                                                                        |                                                                                                                                                                                                                                                                                                                                                                                                                                                                           |
|----------------------------------------------------------------------------------------------------------------------------------------------------------------------------------------|---------------------------------------------------------------------------------------------------------------------------------------------------------------------------------------------------------------------------------------------------------------------------------------------------------------------------------------------------------------------------------------------------------------------------------------------------------------------------|
| <p><b>Optimism:</b> The confidence that things will happen for the best or that desired goals will be attained</p>                                                                     | <p>Did you consider the impact on yourself and others (hospital staff, family etc.) when making the decision?</p>                                                                                                                                                                                                                                                                                                                                                         |
| <p><b>Beliefs about Consequences:</b> Acceptance of the truth, reality, or validity about outcomes of a behaviour in a given situation</p>                                             | <p>Do you think you are likely to be cured better if your antibiotics are administered at hospital? Why?</p> <p>What do you think might have happened if you had chosen to inject at home? E.g. consequences to yourself (including curing your infection), family etc. Is there anything that could help you overcome the problems and difficulties you have mentioned? E.g. relative, more time training, overseeing injecting</p>                                      |
| <p><b>Reinforcement:</b> Increasing the probability of a response by arranging a dependent relationship, or contingency, between the response and a given stimulus</p>                 | <p>What might be done differently to encourage more people to inject at home? Based on all issues, what is the most important thing that health care professionals could have done to encourage you to inject at home</p>                                                                                                                                                                                                                                                 |
| <p><b>Intentions:</b> A conscious decision to perform a behaviour or a resolve to act in a certain way</p>                                                                             | <p>Did you consider the impact on yourself and others (hospital staff, family etc.) when making the decision?</p>                                                                                                                                                                                                                                                                                                                                                         |
| <p><b>Goals:</b> Mental representations of outcomes or end states that an individual wants to achieve</p>                                                                              | <p>How does coming to hospital fit in with your daily routine? Are there situations where other things you have to do have interfered with coming to hospital?</p>                                                                                                                                                                                                                                                                                                        |
| <p><b>Memory, Attention and Decision Processes:</b> The ability to retain information, focus selectively on aspects of the environment and choose between two or more alternatives</p> | <p>Describe to me how you made the decision to come to hospital for your antibiotic treatment rather than injecting at home. Was it an easy decision to make?</p> <p>Do you feel you were in charge of making that decision and why?</p> <p>What situations may cause you to forget/decide not to inject the antibiotic if you were injecting at home? (E.g. time constraints, the presence of others, cleanliness, supplies, small children, risk of infection etc.)</p> |

*OPAT- perspectives of patient who do not self-administer*

|                                                                                                                                                                                                                                            |                                                                                                                                                                                                                                                                                                                                                                                                                                           |
|--------------------------------------------------------------------------------------------------------------------------------------------------------------------------------------------------------------------------------------------|-------------------------------------------------------------------------------------------------------------------------------------------------------------------------------------------------------------------------------------------------------------------------------------------------------------------------------------------------------------------------------------------------------------------------------------------|
| <p><b>Environmental Context and Resources:</b> Any circumstance of a person's situation or environment that discourages or encourages the development of skills and abilities, independence, social competence, and adaptive behaviour</p> | <p>How does hospital administration help meet your personal needs? (E.g. interaction with other patients, support from clinic staff, reassurance that you are seeing medical staff regularly)</p> <p>How would injecting at home fit in with your daily routine?</p>                                                                                                                                                                      |
| <p><b>Social Influences:</b> Those interpersonal processes that can cause individuals to change their thoughts, feelings, or behaviours</p>                                                                                                | <p>Did others influence your decision to come to hospital? How? (Prompts family, friends, work colleagues, other patients, hospital staff (name staff), others who have injected at home?) Did they think it was a good or a bad idea? Did they agree with your decision and why?</p> <p>Who had the final say in making the decision about injecting at home?</p>                                                                        |
| <p><b>Emotion:</b> A complex reaction pattern, involving experiential, behavioural, and physiological elements, by which the individual attempts to deal with a personally significant matter or event</p>                                 | <p>How do you feel about self-injecting at home? What are the main things you would like/dislike about self-injecting at home? Does injecting at home cause you to worry? What specific concerns does it raise?</p> <p>How do you feel about receiving your antibiotics in hospital? What are the main things you like/dislike about coming to hospital? Do you worry about coming to hospital? What specific concerns does it raise?</p> |
| <p><b>Behavioural Regulation :</b> Anything aimed at managing or changing objectively observed or measured actions</p>                                                                                                                     | <p>What would encourage you to inject at home in the future if antibiotics were needed again? (E.g. more training/support, meeting other patients who have self-injected successfully, having a relative/carer self-inject)</p>                                                                                                                                                                                                           |

### *Data collection*

Interviews were conducted within the OPAT clinic by GA, a researcher with considerable experience and expertise in conducting interviews, and recorded digitally, with ongoing verbatim transcription of audio-recordings to allow for identification of data saturation. All transcripts were checked for accuracy by an independent member of the research team (AT).

### *Data analysis*

Transcripts were analysed independently by two researchers (GA, AT) using the Framework Approach following the steps of: data familiarisation; identifying constructs; indexing; charting; mapping; and interpreting.[18] TDF was used as the coding framework to allow elucidation of the behavioural determinants. The coding of the first two interviews was reviewed by a third member of the research team (KFM).

### *Research governance*

Approval was obtained from the NHS Ethics Committee East Midlands–Nottingham 1 (14/EM/1197) and NHS Grampian Research and Development Office (2014RG007).



## Results

### *Demographics*

Twenty patients were approached; all agreed to be interviewed. Interviews were between 30-45 minutes long. The mean age was 54 years (SD  $\pm$ 17.6 years); 13 were male and most (n=19) were at least in their second or third week of IV antibiotic treatment. Just under half (n=9) were being treated for a bone and joint infection (Table 3).

For peer review only

*OPAT- perspectives of patient who do not self-administer***Table 3: Demographics in patients included in study**

|     | <b>Gender</b> | <b>Any comorbidities</b>        | <b>Indication for IV antibiotic therapy</b> | <b>Week of treatment</b>    |
|-----|---------------|---------------------------------|---------------------------------------------|-----------------------------|
| P1  | F             | No                              | Spinal infection – bone and joint           | 3 <sup>rd</sup> week        |
| P2  | M             | No                              | Osteomyelitis in finger                     | End of 1 <sup>st</sup> week |
| P3  | F             | Type 1 diabetic                 | Discitis                                    | 2 <sup>nd</sup> week        |
| P4  | M             | No                              | Knee septic arthritis                       | 3 <sup>rd</sup> week        |
| P5  | F             | No                              | Hip prosthetic joint infection              | 3 <sup>rd</sup> week        |
| P6  | M             | No                              | Cellulitis in leg                           | 2 <sup>nd</sup> week        |
| P7  | M             | No                              | Osteomyelitis in toe                        | 3 <sup>rd</sup> week        |
| P8  | M             | No                              | Knee infection following total replacement  | 3 <sup>rd</sup> week        |
| P9  | M             | No                              | Osteomyelitis in toe                        | 2 <sup>nd</sup> week        |
| P10 | F             | No                              | Osteomyelitis in tibia                      | 2 <sup>nd</sup> week        |
| P11 | M             | Type 1 diabetic                 | Cellulitis in leg                           | 2 <sup>nd</sup> week        |
| P12 | M             | No                              | Cellulitis and bursitis in elbow            | 2 <sup>nd</sup> week        |
| P13 | M             | Liver cirrhosis (non alcoholic) | Lung disease – Mycobacterium infection      | 6 <sup>th</sup> week        |
| P14 | F             | No                              | Osteomyelitis in toe                        | 5 <sup>th</sup> week        |
| P15 | M             | No                              | Infective endocarditis                      | 2 <sup>nd</sup> week        |
| P16 | M             | Type 2 diabetic                 | Infected cannula site - cellulitis          | 2 <sup>nd</sup> week        |
| P17 | M             | No                              | Discitis                                    | 3 <sup>rd</sup> week        |
| P18 | M             | No                              | Infective endocarditis                      | 3 <sup>rd</sup> week        |
| P19 | F             | No                              | Cellulitis in leg                           | 2 <sup>nd</sup> week        |
| P20 | F             | No                              | Cellulitis in leg                           | 3 <sup>rd</sup> week        |

*OPAT- perspectives of patient who do not self-administer*

Key themes are described in relation to TDF domains.

**Domain 1: Knowledge**Lack of knowledge of options available for self-administration

For most patients, there appeared to be a lack of knowledge of options available, including the possibility to self-administer IV antibiotics at home.

*"... they could have asked me as I told them I was a nurse ... they could teach me what I needed to know to do these at home."* P20

In fact, when aware of this option, some patients indicated that they would have been keen to learn how to self-administer.

*"Please you must show me and I can learn. Please can you teach me as it will be better and (do) no(t) have come in here everyday and for the money as well ... help me get back to work ..."* P15

**Domain 2: Skills**Patient perceptions of own skills to self-administer

Some perceived themselves as having necessary skills to self-administer, gained in various ways including observation of staff at OPAT clinic, past or present experiences with self-administration of injections and past training. This made the patients more willing to self-administer antibiotics at home in the future should the option be available.

*"Well you see it [self-administration] should be fairly simple ... just remove the cap here and flush it and connect it push it in here to this and let it drip in slowly and then the alarm goes off and press stop and take the tube that connects to the machine and flush again .... It's easy, just like plumbing!"* P13

A few identified specific skills they required to gain to pursue home self-administration of antibiotics.

*"... more practice and how to flush the cannula and make sure it is not blocked."* P2

**Domain 3: Social/Professional Role and Identity**

Some patients believed that it was not appropriate for them to self-administer and that this was the role of health-care professionals. This influenced their decision to attend hospital rather than self-administer.

*"... Folk are nae [not] trained like hospital staff ... so I would say leave this for the experts"* P11

*OPAT- perspectives of patient who do not self-administer*

Many expressed confidence in the OPAT nurse.

*"Even if they [family members] did I would not trust them. She [OPAT nurse] is very good and does it quick and I know it's safe." P1*

**Domain 4: Beliefs about capabilities**Belief/lack of in own abilities

Many patients perceived themselves as being competent.

*"... So I don't think giving the right dosage; I don't think this would be an issue at all. I could cope with that" P5*

These patients felt confident in their own capabilities should they be given the opportunity to be shown, taught and practice prior to self-administering at home.

However, some were lacking in self-confidence and did not believe they were capable of self-administration, citing reasons including complex and difficult home circumstances, and physical inability to self-administer.

*"...The trouble is ... I have the jitters and my doctors know about that as well ... I don't know why I have this I have this jittering in my legs and some jittering in my arms. P8*

**Domain 5: Belief about consequences**Belief that it is safer to have antibiotics administered in hospital

Administration of antibiotics in hospital provided some patients with reassurance that a knowledgeable health-care professional was administering their therapy and perceived this as being a safer option to self-administration. Others felt secure that hospital was a cleaner environment than home. This encouraged patients to choose hospital administration over self-administration.

*"I thought it would be a lot safer to do them here in the hospital ... I think hospitals are cleaned every day with antibacterials and the nurses wear gloves and use the gel so in that respect hospitals are much more cleaner and a much safer environment." P18*

Some patients cited potential negative consequences if they self-administered.

*"The thing that really worries me about doing it at home is getting an infection." P17*

Others remarked that it was likely to make no difference in terms of consequences whether the antibiotic was self-administered at home or in hospital by a healthcare professional.

*"They [antibiotics] would work exactly the same as it's the same stuff and given the same way." P13*

*OPAT- perspectives of patient who do not self-administer*Belief that self-administration could potentially improve quality of life

Some patients thought that self-administration would facilitate their return to work since it would no longer be necessary to attend hospital on a daily basis.

*"See like if I could do it myself like then it could work around better and it would help a lot with getting back to work ... as they say no work no pay."*P3

Home self-administration was also considered to potentially have a positive impact on patient quality of life, including social life and having less impact on the rest of the family.

*"Coming in to hospital is a pain sometimes as I get job interviews and have turned down some of these as I'm coming here and I often cancel friends' invites so I can come to the hospital."* P2

Spending less time travelling was an incentive for patients to self-administer.

*"Well I don't know other than it would save the journey in you see I live away out in XXX so it would save a long trip here and back."*P7

In some cases, driving into hospital was also impacting other family members negatively.

*"Oh yeah because you would not need to rely on other people to take you in here. Normally my dad, who is a taxi driver takes me but he is losing the chance of making a fare every time he comes in with me."*P19

**Domain 6: Environment context and resources**Lack of parking availability in hospital premises

A lack of parking availability within the hospital grounds and the distance required to reach the clinic were also cited as encouraging self-administration.

*"I had to walk from the rotunda [side entrance of the hospital], up the passage way to the lifts and I was a bit shaky by the time I got to the lift."* P16

Complex home circumstances

Issues relating to patients' dependents were also factors which would encourage self-administration.

*"Aye tell me about ... it's a bit of nightmare [coming into hospital daily]. We also have a two year old so my partner she works as well."* P3

Just as home circumstances were a potential facilitator to home self-administration, patients also cited dependents and other home circumstances as being the reason behind the decision to opt out of self-administration.

## OPAT- perspectives of patient who do not self-administer

" ... You see it's complicated; my husband, he has dementia and takes up all my time." P1

One patient was required to attend hospital to have investigations as well as antibiotic administration making it more convenient to opt for hospital administration.

"I think it's more convenient to get everything done at the same time antibiotics, blood tests ... " P13

Another patient discussed his self-employment allowed flexibility in his daily schedule which discouraged him from self-administering.

"It does not bother me [coming in] cause it's my own business so I'm the boss ... I can be totally flexible and can come in any time of the day." P12

### **Domain 7: Emotions**

#### Anxiety and stress associated with self-administration

A number of patients felt that self-administration would be a complex task that would be too stressful leading to considerable anxiety including a fear of using and handling needles.

"I would consider it but I would never have the confidence to do it ... if I had to use a needle I would not do it. I'm petrified of needles." P6

Concern about potential complications and consequences of self-administration also acted as a barrier to learning to self-administer antibiotics.

"It's not the learning so much it's the doing and what to do if it goes wrong. What about if it [the antibiotic] goes in the wrong place? ... I feel sick ..." P1

#### Importance of staff reassurances and encouragement

Some patients stressed the importance of hospital staff potentially exerting a positive effect calming patients' stresses and anxieties by providing reassurance during the training process.

"The most important thing though is to have the staff like you to do it [training] right and support and instil confidence in their patients". P20

### **Domain 8: Memory, Attention & Decision Process**

#### Patient involvement in decision making

This domain involved the decision making and factors involved in patients choice between ways of administration. Many patients indicated that they were not involved and consulted in deciding whether to attend hospital or self-administer with decision to come to hospital made by hospital staff.

*OPAT- perspectives of patient who do not self-administer*

1  
2  
3  
4  
5  
6  
7  
8  
9  
10  
11  
12  
13  
14  
15  
16  
17  
18  
19  
20  
21  
22  
23  
24  
25  
26  
27  
28  
29  
30  
31  
32  
33  
34  
35  
36  
37  
38  
39  
40  
41  
42  
43  
44  
45  
46  
47  
48  
49  
50  
51  
52  
53  
54  
55  
56  
57  
58  
59  
60

*"Well I didn't get to make that choice. I was just told that I was going to get this treatment and that I would need to come into hospital three times a week to get these infusions and that was it."*P18

Despite lack of involvement in the decision making process, most expressed confidence in the healthcare professionals' abilities and judgements.

*"I would say the doctor did whatever was best for my situation."* P4

**Domain 9: Social influences**

A number of patients indicated that hospital health-care professionals suggested that it would be the better option for them if they attended hospital for administration of antibiotics. They did not question this suggestion in the belief that the healthcare professionals were right.

*"... I'm an 80 year old so I just do whatever they [doctors] say."* P11

A patient indicated that his wife was the main influence encouraging him to attend the hospital for administration,

*"my wife ... she prefers me to come in here as she always worries about me"*.P13

Another patient preferred the social aspect of attending a site outwith his home for administration.

*"No I'm happy to come in here, it gets me out gets me walking a little bit further."* P4

A patient described attending hospital as more rewarding from a social aspect and this encouraged him to choose hospital administration as opposed to developing the skills to self-administer.

*"Well its fine it's a trip in and I meet some nice people and I'm coming anyway for my radiotherapy ... I come in the patient transport."* P7

**Domain 10: Behavioural regulation**Experiences gained through attending OPAT clinic

All patients had been attending the OPAT clinic for antibiotic administration for a number of days. Some indicated that following experiences of attending on a daily basis, they would still opt to attend the clinic given the choice in the future.

*"If you have got someone in my situation it may not be feasible for them to do it at home."* P14

Others indicated that based on this experience, they would consider learning and training self-administration of antibiotics choosing this option in the future.

*OPAT- perspectives of patient who do not self-administer*

1  
2  
3 "... they could teach me what I needed to know to do these at home and this  
4 would have reduced my stress levels I mean stress with childcare for my autistic  
5 son..."P20  
6

7  
8 Information about these domains did not emerge from the available dataset:  
9 optimism, reinforcement, intentions and goals.  
10

11 Barriers and facilitators to home self-administration emerging from this research  
12 have been summarised in Table 4.  
13  
14  
15  
16  
17  
18  
19  
20  
21  
22  
23  
24  
25  
26  
27  
28  
29  
30  
31  
32  
33  
34  
35  
36  
37  
38  
39  
40  
41  
42  
43  
44  
45  
46  
47  
48  
49  
50  
51  
52  
53  
54  
55  
56  
57  
58  
59  
60

For peer review only



*OPAT- perspectives of patient who do not self-administer***Table 4: Barriers and facilitators to home self-administration**

| <b>TDF Domain</b>                             | <b>Subtheme/s</b>                                                         | <b>Facilitators</b> | <b>Barriers</b>   |
|-----------------------------------------------|---------------------------------------------------------------------------|---------------------|-------------------|
| <b>Knowledge</b>                              | Lack of knowledge of potential options available for self-administration  |                     | √                 |
| <b>Beliefs of capabilities</b>                | Belief and confidence in own abilities                                    | √                   |                   |
|                                               | Lack of confidence in own abilities                                       |                     | √                 |
| <b>Skills</b>                                 | A perception that have necessary skills to self-administer                | √                   |                   |
| <b>Social/Professional Role and identity</b>  | Belief that not role of patient to self-administer                        |                     | √                 |
| <b>Beliefs about consequences</b>             | Belief that safer to administer in hospital                               |                     | √                 |
|                                               | Belief that self-administration could potentially improve quality of life | √                   |                   |
| <b>Environmental context/resources</b>        | Lack of parking on hospital grounds                                       | √                   |                   |
|                                               | Complex home circumstances                                                | √<br>(dependents)   | √<br>(dependents) |
| <b>Emotions</b>                               | Anxiety and stress associated with self-administration                    |                     | √                 |
|                                               | Staff reassurances, encouragement, support and training                   | √                   |                   |
| <b>Social influences</b>                      | Influences of family/friends                                              |                     | √                 |
| <b>Memory, attention and decision process</b> | Lack of patient involvement in decision making                            |                     | √                 |
| <b>Behavioural regulation</b>                 | Experiences gained through attending OPAT clinic                          | √                   | √                 |

*OPAT- perspectives of patient who do not self-administer***Discussion**

To our knowledge, this is the first study adopting a qualitative methodology to explore the understanding, beliefs and attitudes of patients who are not self-administering IV antibiotics. Key findings are that from the patients' perspectives, the main determinants that appeared to impact their decision not to self-administer were lack of knowledge of available options, a perception that hospital staff are better trained, and anxieties of potential complications of self-administration. The main determinants that emerged as potentially encouraging patients to self-administer included the perceptions of being sufficiently knowledgeable, skilful and competent, and that self-administration afforded the potential to work whilst receiving treatment. Patient experiences and awareness of options of OPAT administration were likely to impact future choices of self-administration. The novelty of the approach used in this research makes it difficult to compare to conclusions from other research, whether from the UK or out-with. To this effect, the discussion will focus on suggesting a number of interventions to overcome the barriers identified through this research and which are based on evidence based behavioural change techniques. Overall, the interventions are aimed at promoting improvement in OPAT service delivery.

There are several strengths including use of a theoretical framework to underpin research design and analysis, and the measures taken to promote research trustworthiness, particularly the elements of credibility and dependability, enhancing research rigour.[13,14,19] Furthermore, data saturation was apparent. There are, however, limitations to the study. The research was conducted within one hospital in the North-East of Scotland; findings are not necessarily transferable to all OPAT clinics in the UK or beyond. While there were attempts to promote credibility of findings such as having an interviewer who was not a member of the healthcare team, it is possible that some patients may not have been truthful. The study also focused solely on patient perspectives and no members of the healthcare team were interviewed. Patients were interviewed if they were deemed suitable for self-administration by the team rather than based on whether or not they were provided the option of self-administration. Despite

*OPAT- perspectives of patient who do not self-administer*

1  
2  
3 these limitations, this qualitative research has added to the very limited evidence  
4 base around behavioural determinants influencing a patient's decision to self-  
5 administer IV antibiotics.  
6  
7

8  
9 This study has elucidated the behavioural determinants acting as facilitators or  
10 barriers to self-administration which can act as targets for any intervention,  
11 promoting self-administration. The interventions suggested here will focus on  
12 the barriers rather than facilitators since these are the interventions most likely  
13 to increase uptake of self-administration. Patient-centred, tailored interventions  
14 may incorporate one or more behaviour change techniques (BCTs), described as  
15 processes that are likely to change behaviour. Michie et al mapped a number of  
16 evidence-based BCTs to specific TDF domains, highlighting the importance of  
17 considering theory as part of intervention development as articulated in the UK  
18 MRC guidance.[13,20]  
19  
20  
21  
22  
23  
24  
25

26 Lack of belief in capabilities was a barrier to self-administration and resulted in  
27 lack of confidence in patient's own abilities to self-administer. The mapped BCT  
28 '*graded tasks*' may be implemented, where patients are initially set easy-to-  
29 perform tasks, followed by more complex tasks, aiming at building up the difficulty  
30 until the patient achieves the target behaviour. This approach may also alleviate  
31 the TDF emotional barriers relating to anxiety, providing reassurance over  
32 potential negative consequences of self-administration and the belief that hospital  
33 administration is safer.  
34  
35  
36  
37  
38  
39

40 While observing patients, the BCT of '*verbal persuasion about capability*', could be  
41 considered whereby reassurance is provided of success, overcoming self-doubt  
42 and increasing self-belief. There is evidence that self-administration will also  
43 empower patients, increase autonomy leading to enhanced satisfaction.[8]  
44  
45  
46  
47

48 Stress was also a major negative emotion acting as a barrier to self-  
49 administration. In addition to skills-based training, BCTs should centre on  
50 emotional wellbeing in the form of '*monitoring of emotional consequences*'.  
51 Patients are encouraged to self-monitor their feelings while attempting self-  
52 administration. '*Emotional social support*' could also be provided via a named  
53 health-care professional, website or smartphone technology, which has had  
54 success in patients receiving home dialysis.[21]  
55  
56  
57  
58  
59  
60

*OPAT- perspectives of patient who do not self-administer*

1  
2  
3 There is a drive within healthcare services to involve patients in decision making  
4 taking on a person-centred approach. However, in this group of patients, though  
5 patients were praising of hospital staff, there appears to be a lack of involvement  
6 of patients in the decision making process. Involvement of patients in decision  
7 making and the need for individualised discussions with patients on what is the  
8 better option for them should be encouraged and maybe an intervention targeted  
9 at health-care professionals rather than patients.  
10  
11  
12  
13  
14

15  
16 Whilst the interventions based on BCTs being suggested are taking into account  
17 most barriers to self-administration emerging in this research, in a few cases, it  
18 may be in the patient's interest to attend the OPAT clinic e.g. patients with  
19 complex home circumstances.  
20  
21  
22

23 A large number of patients in this research showed a lack of knowledge of self-  
24 administration as a potential option for administering IV antimicrobials. This is  
25 despite the fact that it is routine practice to provide home self-administration as  
26 an option to suitable patients. Aspects such as recall bias and social desirability  
27 bias linked to the patients' responses need to be considered. Keeping in mind that  
28 this from a patient perspective, a number of factors associated with the system,  
29 mainly the lack of resource available, may be a major contributor to this. There is  
30 one nurse caring for approximately 150 patients annually; however current  
31 experience indicates that one nurse should care for 100 patients annually and  
32 having a larger ratio can have an impact on the ability of staff to assess patients  
33 for suitability of OPAT in a timely manner (Personal communication Greater  
34 Glasgow and Clyde). The lack of resource makes it impossible for the nurse to  
35 provide the sufficient one-to-one training that is initially relatively intense but that  
36 has been described in the literature as providing success in allowing patients to  
37 safely self-administer at home.[9] The investment in the resource may then be  
38 offset by the patient being discharged home and efficiently planned in a way that  
39 training is commenced when the patient is still a hospital inpatient. Additional  
40 resource such as equipment (example, infusion pumps) that patients may be  
41 provided with at home, also need to be considered to enable an increase in self-  
42 administration uptake rate.  
43  
44  
45  
46  
47  
48  
49  
50  
51  
52  
53  
54  
55  
56

57 Overall this study shows that patients are very appreciative of the skills and  
58 expertise of healthcare professionals within the OPAT clinic. However, the study  
59  
60

*OPAT- perspectives of patient who do not self-administer*

1  
2  
3 indicates that this expertise needs to shift so that skills and confidence are  
4 transferrable to patients through interventions based on BCTs. Though an initial  
5 investment in resource is required (including increased manpower and  
6 equipment), this will be offset in a number of ways particularly if training is  
7 commenced during the patient's planned inpatient stay.[9] More emphasis needs  
8 to be placed on informing the patients of the option of self-administration. To  
9 enhance the success of development of this complex intervention, further work is  
10 required to explore the views and perceptions of healthcare professionals to  
11 ensure that the development and implementation of any intervention is successful.  
12 Such research will also enable exploration of health-care professionals being  
13 potential barriers or facilitators to self-administration. The hesitancy of health-  
14 care professionals to initiate self-care has been shown as a major barrier in a small  
15 scale US study as opposed to a patient reluctance to take on self-care. [23]

16  
17 It is likely that in the near future, a more integrated approach towards patient  
18 care is adopted combining primary care expertise at home treatment and  
19 secondary care specialist knowledge.[1] An OPAT service is an ideal way of  
20 embracing this. **(4165)**

*OPAT- perspectives of patient who do not self-administer***ACKNOWLEDGEMENTS**

We would like to acknowledge all the patients who took the time to be interviewed and without whose input this research would not have been possible.

For peer review only

**REFERENCES**

- [1] Chapman ALN, Seaton RA, Cooper MA et al. Good practice recommendations for outpatient parenteral antimicrobial therapy (OPAT) in adults in the UK: a consensus statement. *J Antimicrob Chemother* 2012;doi:10.1093/jac/dks003
- [2] MacKenzie M, Rae N, Nathwani D. Outcomes from global adult outpatient parenteral antimicrobial therapy programmes: A review of the last decade. *Int J Antimicrob Agents* 2014;**43**:7-16
- [3] Psaltikidis EM, Silva E, Bustorff-Silva JM et al. Economic analysis of outpatient parenteral antimicrobial therapy (OPAT): a systematic review. *Value in Health* 2015;**18**:A582-83
- [4] Chapman ALN Outpatient parenteral antimicrobial therapy. *BMJ* 2013;**346**:f1585
- [5] Barr DA, Semple L, Seaton RA. Outpatient parenteral antimicrobial therapy (OPAT) in a teaching hospital-based practice: a retrospective cohort study describing experience and evolution over 10 years. *Int J Antimicrob Agents* 2012;**39**:407-13
- [6] Wong KK, Fraser TG, Shrestha NK et al. Low incidence of *Clostridium difficile* infection (CDI) in patients treated with outpatient parenteral antimicrobial therapy (OPAT). *Inf Control & Hosp Epidemiol* 2015;**36**:doi:10.1017/ice.2014.6
- [7] Barr DA, Semple L, Seaton RA. Self-administration of outpatient parenteral antibiotic therapy and risk of catheter-associated adverse events: a retrospective cohort study. *Eur J Clin Microbiol Infect Dis* 2012;**31**:2611-29
- [8] Matthews PC, Conlon CP, Berendt AR et al. Outpatient parenteral antimicrobial therapy (OPAT): is it safe for selected patients to self-administer at

*OPAT- perspectives of patient who do not self-administer*

home? A retrospective analysis of a large cohort over 13 years. *J Antimicrobial Chemother* 2007;**60**:356-62

[9] Subedi S, Looke DFM, McDougall DA et al. Supervised self-administration of outpatient parenteral antibiotic therapy: a report from a large tertiary hospital in Australia. *Int J Infect Dis* 2015;**30**:161-65

[10] Tice AD, Rehm SJ, Dalovisio JR et al. Practice guidelines for outpatient parenteral therapy. *Clin Infect Dis* 2004;**38**:1651-72

[11] British Society for Antimicrobial Chemotherapy. *Outpatient Parenteral Antimicrobial Therapy Initiative* <http://www.bsac.org.uk/opat-landing-page/>

[12] British Society for Antimicrobial Chemotherapy. *The National OPAT Outcomes Registry*. <http://opatregistry.com/index.php/auth/login>

[13] MRC, Medical Research Council. *Developing and evaluating complex interventions: new guidance*. <https://www.mrc.ac.uk/documents/pdf/complex-interventions-guidance>.

[14] Cane J, O'Connor D, Michie S. Validation of the theoretical domains framework for use in behaviour change and implementation research. *Implementation Science*. 2012;**7**:doi:10.1186/1748-5908-7-37

[15] Phillips CJ, Marshall AP, Chaves NJ et al. Experiences of using the Theoretical Domains Framework across diverse clinical environments: a qualitative study. *J Multidiscip Healthc* 2015;**8**: doi: [10.2147/JMDH.S78458](https://doi.org/10.2147/JMDH.S78458)

[16] Francis JJ, Johnston M, Robertson C, Glidewell L, Entwistle V, Eccles MP, et al. What is an adequate sample size? Operationalising data saturation for theory based studies. *Psychology and Health*. 2009;**10**:1229-45



*OPAT- perspectives of patient who do not self-administer*

1  
2  
3 [17] Patton MQ. *Enhancing the quality and credibility of qualitative analysis*.  
4 HSR: Health Services Research.  
5  
6 [https://www.ncbi.nlm.nih.gov/pmc/articles/PMC1089059/pdf/hsresearch00022-](https://www.ncbi.nlm.nih.gov/pmc/articles/PMC1089059/pdf/hsresearch00022-0112.pdf)  
7  
8 0112.pdf  
9

10  
11  
12 [18] Ritchie J, Lewis J, McNughton Nicholls C, et al. *Qualitative research*  
13 *practice: a guide for social science students and researchers*. 2013, London: Sage  
14  
15

16  
17  
18 [19] Shenton AK Strategies for ensuring trustworthiness in qualitative research  
19 projects. *Education for Information*. 2004;**22**:63-75  
20  
21

22  
23  
24 [20] Michie S, Wood CE, Johnstone M et al. Behaviour change techniques: the  
25 development and evaluation of a taxonomic method for reporting and describing  
26 behaviour change interventions (a suite of five studies involving consensus  
27 methods, randomised controlled trials and analysis of qualitative data) *Health*  
28 *Technol Assess* 2015;**19**: 99  
29  
30  
31  
32

33  
34  
35 [21] Combes G, Allen K, Sein K et al. Taking hospital treatments home: a mixed  
36 methods case study looking at the barriers and success factors for home dialysis  
37 treatment and the influence of a target on uptake rates *Implementation Science*  
38 2015;**10**:doi 10.1186/s13012-015-0344-8  
39  
40  
41

42  
43  
44 [22] Agrawal D, Ganguly A, Bhavan PB. Capturing the patient voice. Patients  
45 welcome IV self-care; Physicians hesitate. [http://catalyst.nejm.org/patients-](http://catalyst.nejm.org/patients-welcome-iv-antibiotics-self-care/;2017)  
46 [welcome-iv-antibiotics-self-care/;2017](http://catalyst.nejm.org/patients-welcome-iv-antibiotics-self-care/;2017) [accessed 23 May 2018]  
47  
48  
49  
50  
51  
52  
53  
54  
55  
56  
57  
58  
59  
60

*OPAT- perspectives of patient who do not self-administer*Author's contribution**All authors have been involved in:**

- Substantial contributions to the conception or design of the work; or the acquisition, analysis, or interpretation of data for the work; AND
- Drafting the work or revising it critically for important intellectual content; AND
- Final approval of the version to be published; AND
- Agreement to be accountable for all aspects of the work in ensuring that questions related to the accuracy or integrity of any part of the work are appropriately investigated and resolved.

Antonella Tonna: Principal investigator, involved in all aspects.

Geraldine Anthony: Research fellow, involved in all aspects but mainly interviewing of patients, transcribing, data analysis, draft if work.

Ivan Tonna, Rob Laing, Alexander McKenzie: Consultant infectious diseases physicians on site where study conducted. They lead mainly on conception of work, identifying the need for this research.

Vibhu Paudyal, Katrina Forbes-McKay: Involved mainly in design of work, particularly in development of theoretical basis for development of topic guide; analysis of data based on theoretical framework.

Sharon Falconer: Lead nurse at OPAT clinic. Lead mainly on conception of work, recruitment of patients

Gillian McCartney: Antimicrobial pharmacist. Lead mainly on conception of work, analysis of data

Derek Stewart: Involved in all aspects overseeing the quality of the work. Closely involved in conception and analysis and revising the final version for intellectual content.

1  
2  
3  
4  
5  
6  
7  
8  
9  
10  
11  
12  
13  
14  
15  
16  
17  
18  
19  
20  
21  
22  
23  
24  
25  
26  
27  
28  
29  
30  
31  
32  
33  
34  
35  
36  
37  
38  
39  
40  
41  
42  
43  
44  
45  
46  
47  
48  
49  
50  
51  
52  
53  
54  
55  
56  
57  
58  
59  
60

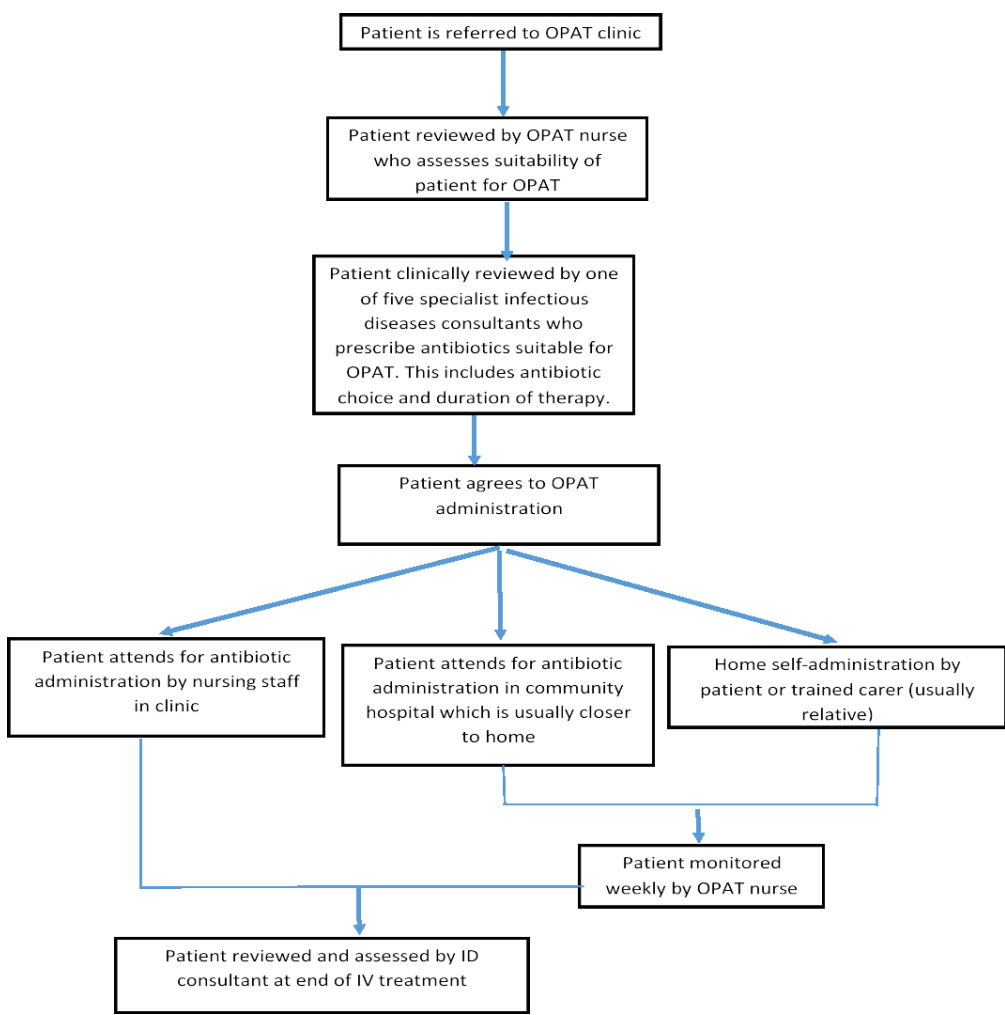

## COREQ (CONsolidated criteria for REporting Qualitative research) Checklist

A checklist of items that should be included in reports of qualitative research. You must report the page number in your manuscript where you consider each of the items listed in this checklist. If you have not included this information, either revise your manuscript accordingly before submitting or note N/A.

| Topic                                          | Item No. | Guide Questions/Description                                                                                                                              | Reported on Page No. |
|------------------------------------------------|----------|----------------------------------------------------------------------------------------------------------------------------------------------------------|----------------------|
| <b>Domain 1: Research team and reflexivity</b> |          |                                                                                                                                                          |                      |
| <i>Personal characteristics</i>                |          |                                                                                                                                                          |                      |
| Interviewer/facilitator                        | 1        | Which author/s conducted the interview or focus group?                                                                                                   |                      |
| Credentials                                    | 2        | What were the researcher's credentials? E.g. PhD, MD                                                                                                     |                      |
| Occupation                                     | 3        | What was their occupation at the time of the study?                                                                                                      |                      |
| Gender                                         | 4        | Was the researcher male or female?                                                                                                                       |                      |
| Experience and training                        | 5        | What experience or training did the researcher have?                                                                                                     |                      |
| <i>Relationship with participants</i>          |          |                                                                                                                                                          |                      |
| Relationship established                       | 6        | Was a relationship established prior to study commencement?                                                                                              |                      |
| Participant knowledge of the interviewer       | 7        | What did the participants know about the researcher? e.g. personal goals, reasons for doing the research                                                 |                      |
| Interviewer characteristics                    | 8        | What characteristics were reported about the interviewer/facilitator? e.g. Bias, assumptions, reasons and interests in the research topic                |                      |
| <b>Domain 2: Study design</b>                  |          |                                                                                                                                                          |                      |
| <i>Theoretical framework</i>                   |          |                                                                                                                                                          |                      |
| Methodological orientation and Theory          | 9        | What methodological orientation was stated to underpin the study? e.g. grounded theory, discourse analysis, ethnography, phenomenology, content analysis |                      |
| <i>Participant selection</i>                   |          |                                                                                                                                                          |                      |
| Sampling                                       | 10       | How were participants selected? e.g. purposive, convenience, consecutive, snowball                                                                       |                      |
| Method of approach                             | 11       | How were participants approached? e.g. face-to-face, telephone, mail, email                                                                              |                      |
| Sample size                                    | 12       | How many participants were in the study?                                                                                                                 |                      |
| Non-participation                              | 13       | How many people refused to participate or dropped out? Reasons?                                                                                          |                      |
| <i>Setting</i>                                 |          |                                                                                                                                                          |                      |
| Setting of data collection                     | 14       | Where was the data collected? e.g. home, clinic, workplace                                                                                               |                      |
| Presence of non-participants                   | 15       | Was anyone else present besides the participants and researchers?                                                                                        |                      |
| Description of sample                          | 16       | What are the important characteristics of the sample? e.g. demographic data, date                                                                        |                      |
| <i>Data collection</i>                         |          |                                                                                                                                                          |                      |
| Interview guide                                | 17       | Were questions, prompts, guides provided by the authors? Was it pilot tested?                                                                            |                      |
| Repeat interviews                              | 18       | Were repeat interviews carried out? If yes, how many?                                                                                                    |                      |
| Audio/visual recording                         | 19       | Did the research use audio or visual recording to collect the data?                                                                                      |                      |
| Field notes                                    | 20       | Were field notes made during and/or after the interview or focus group?                                                                                  |                      |
| Duration                                       | 21       | What was the duration of the interviews or focus group?                                                                                                  |                      |
| Data saturation                                | 22       | Was data saturation discussed?                                                                                                                           |                      |
| Transcripts returned                           | 23       | Were transcripts returned to participants for comment and/or                                                                                             |                      |

| Topic                                  | Item No. | Guide Questions/Description                                                                                                        | Reported on Page No. |
|----------------------------------------|----------|------------------------------------------------------------------------------------------------------------------------------------|----------------------|
|                                        |          | correction?                                                                                                                        |                      |
| <b>Domain 3: analysis and findings</b> |          |                                                                                                                                    |                      |
| <i>Data analysis</i>                   |          |                                                                                                                                    |                      |
| Number of data coders                  | 24       | How many data coders coded the data?                                                                                               |                      |
| Description of the coding tree         | 25       | Did authors provide a description of the coding tree?                                                                              |                      |
| Derivation of themes                   | 26       | Were themes identified in advance or derived from the data?                                                                        |                      |
| Software                               | 27       | What software, if applicable, was used to manage the data?                                                                         |                      |
| Participant checking                   | 28       | Did participants provide feedback on the findings?                                                                                 |                      |
| <i>Reporting</i>                       |          |                                                                                                                                    |                      |
| Quotations presented                   | 29       | Were participant quotations presented to illustrate the themes/findings?<br>Was each quotation identified? e.g. participant number |                      |
| Data and findings consistent           | 30       | Was there consistency between the data presented and the findings?                                                                 |                      |
| Clarity of major themes                | 31       | Were major themes clearly presented in the findings?                                                                               |                      |
| Clarity of minor themes                | 32       | Is there a description of diverse cases or discussion of minor themes?                                                             |                      |

Developed from: Tong A, Sainsbury P, Craig J. Consolidated criteria for reporting qualitative research (COREQ): a 32-item checklist for interviews and focus groups. *International Journal for Quality in Health Care*. 2007. Volume 19, Number 6: pp. 349 – 357

**Once you have completed this checklist, please save a copy and upload it as part of your submission. DO NOT include this checklist as part of the main manuscript document. It must be uploaded as a separate file.**

# BMJ Open

## Home self-administration of intravenous antibiotics as part of an outpatient parenteral antibiotic therapy service: A qualitative study of the perspectives of patients who do not self-administer

|                                 |                                                                                                                                                                                                                                                                                                                                                                                                                                                                                                                                                                                                                                                                                      |
|---------------------------------|--------------------------------------------------------------------------------------------------------------------------------------------------------------------------------------------------------------------------------------------------------------------------------------------------------------------------------------------------------------------------------------------------------------------------------------------------------------------------------------------------------------------------------------------------------------------------------------------------------------------------------------------------------------------------------------|
| Journal:                        | <i>BMJ Open</i>                                                                                                                                                                                                                                                                                                                                                                                                                                                                                                                                                                                                                                                                      |
| Manuscript ID                   | bmjopen-2018-027475.R1                                                                                                                                                                                                                                                                                                                                                                                                                                                                                                                                                                                                                                                               |
| Article Type:                   | Research                                                                                                                                                                                                                                                                                                                                                                                                                                                                                                                                                                                                                                                                             |
| Date Submitted by the Author:   | 27-Nov-2018                                                                                                                                                                                                                                                                                                                                                                                                                                                                                                                                                                                                                                                                          |
| Complete List of Authors:       | Tonna, Antonella; Robert Gordon University, Anthony, Geraldine; Robert Gordon University<br>Tonna, Ivan; Aberdeen Royal Infirmary Infectious Diseases<br>Paudyal, Vibhu; University of Birmingham, Centre of Academic Primary Care<br>Forbes-McKay, Katrina; Robert Gordon University, School of Applied Social Studies<br>Laing, Rob; Aberdeen Royal Infirmary Infectious Diseases<br>Mckenzie, Alexander; Aberdeen Royal Infirmary Infectious Diseases<br>Falconer, Sharon; Aberdeen Royal Infirmary Infectious Diseases<br>McCartney, Gillian; Aberdeen Royal Infirmary Infectious Diseases<br>Stewart, Derek; The Robert Gordon University, School of Pharmacy and Life Sciences |
| <b>Primary Subject Heading</b>: | Qualitative research                                                                                                                                                                                                                                                                                                                                                                                                                                                                                                                                                                                                                                                                 |
| Secondary Subject Heading:      | Infectious diseases                                                                                                                                                                                                                                                                                                                                                                                                                                                                                                                                                                                                                                                                  |
| Keywords:                       | QUALITATIVE RESEARCH, OPAT, behaviours                                                                                                                                                                                                                                                                                                                                                                                                                                                                                                                                                                                                                                               |
|                                 |                                                                                                                                                                                                                                                                                                                                                                                                                                                                                                                                                                                                                                                                                      |

SCHOLARONE™  
Manuscripts

1  
2  
3  
4  
5  
6  
7  
8  
9  
10  
11  
12

# Home self-administration of intravenous antibiotics as part of an outpatient parenteral antibiotic therapy service: A qualitative study of the perspectives of patients who do not self-administer

13  
14

## Corresponding Author:

15 Dr Antonella Tonna BPharm (Hons), MSc, PhD

16 Lecturer in Clinical Pharmacy

17 School of Pharmacy and Life Sciences

18 Robert Gordon University

19 Sir Ian Wood Building

20 Garthdee Road

21 Aberdeen AB10 7GJ

22 [a.tonna@rgu.ac.uk](mailto:a.tonna@rgu.ac.uk)

23 Tel: 07776286038

24  
25  
26  
27  
28  
29  
30  
31  
32  
33  
34  
35  
36  
37 Dr Geraldine Anthony PhD, MSc, BSc

38 Research Fellow

39 School of Pharmacy and Life Sciences

40 Robert Gordon University

41 Riverside East

42 Garthdee Road

43 Aberdeen AB10 7GJ

*OPAT- perspectives of patient who do not self-administer*

1  
2  
3 Dr Ivan Tonna MD, MCRP (UK), MSc, FRCP (Edin(  
4

5 Consultant Physician  
6

7 Ward 111  
8

9 Aberdeen Royal Infirmary  
10

11 Foresterhill  
12

13 Aberdeen AB25 2ZN  
14  
15

16  
17 Dr Vibhu Paudyal BPharm, MSc, PhD

18 Senior Lecturer in Clinical Pharmacy  
19

20 School of Pharmacy  
21

22 University of Birmingham  
23

24 Edgbaston, Birmingham  
25

26 B15 2TT  
27  
28

29  
30 Dr Katrina Forbes-McKay MA (Hons), PhD

31 Lecturer in Psychology  
32

33 School of Applied Social Studies  
34

35 Robert Gordon University  
36

37 Riverside East  
38

39 Garthdee Road  
40

41 Aberdeen AB10 7GJ  
42  
43

44  
45  
46 Dr Rob Laing MBChB, MD, MRCP (UK), FRCP (Edin)

47 Consultant Physician  
48

49 Ward 111  
50

51 Aberdeen Royal Infirmary  
52

53 Foresterhill  
54

55 Aberdeen AB25 2ZN  
56  
57  
58  
59  
60



*OPAT- perspectives of patient who do not self-administer*

1  
2  
3 Dr Alexander McKenzie BMedBiol, MBChB, DTM&H, FRCP

4  
5 Consultant Physician

6  
7 Ward 111

8  
9 Aberdeen Royal Infirmary

10  
11 Foresterhill

12  
13 Aberdeen AB25 2ZN

14  
15  
16  
17 Mrs Sharon Falconer RCN, NMC

18  
19 OPAT Nurse

20  
21 Consultant Physician

22  
23 Ward 111

24  
25 Aberdeen Royal Infirmary

26  
27 Foresterhill

28  
29 Aberdeen AB25 2ZN

30  
31  
32 Mrs Gillian McCartney BSc, MSc

33  
34 Specialist antimicrobial pharmacist

35  
36 Ward 111

37  
38 Aberdeen Royal Infirmary

39  
40 Foresterhill

41  
42 Aberdeen AB25 2ZN

43  
44  
45  
46 Prof Derek Stewart BSc, MSc, PhD

47  
48 Professor of Pharmacy Practice

49  
50 School of Pharmacy And Life Sciences

51  
52 Robert Gordon University

53  
54 Sir Ian Wood Building

55  
56 Garthdee Road

57  
58 Aberdeen AB10 7GJ

*OPAT- perspectives of patient who do not self-administer***Abstract****Objectives**

This study aimed to use a theoretical approach to understand the determinants of behaviour in patients not home self-administering IV antibiotics.

**Setting**

Outpatient care: Included patients were attending an outpatient clinic for IV antibiotic administration in the North-East of Scotland

**Participants**

Patients were included if they had received more than seven days of IV antibiotics, and were aged 16 years and over. Twenty potential participants were approached and all agreed to be interviewed. 13 were male with a mean age of 54 years (SD 17.6).

**Outcomes**

Key behavioural determinants that influenced patients' behaviours relating to self-administration of IV antibiotics

**Design**

Qualitative, semi-structured in-depth interviews were undertaken with a purposive sample of patients. An interview schedule, underpinned by the Theoretical Domains Framework (TDF), was developed, reviewed for credibility and piloted. Interviews were audio-recorded and transcribed verbatim. Data were analysed thematically using the TDF as the coding framework.

**Results**

The key behavioural determinants emerging as encouraging patients to self-administer IV antibiotics were the perceptions of being sufficiently knowledgeable, skilful and competent and that self-administration afforded the potential to work whilst administering treatment. The key determinants that impacted their decision not to self-administer were lack of knowledge of available options, a perception that hospital staff are better trained and anxieties of potential complications.

**Conclusion**

Though patients are appreciative of the skills and knowledge of hospital staff, there is also a willingness amongst patients to home self-administer antibiotics. However, the main barrier emerges to be a perceived lack of knowledge of ways of doing this at home. To overcome this, a number of interventions are suggested based on evidence based behavioural change techniques. **(265)**

For peer review only

*OPAT- perspectives of patient who do not self-administer*Strengths and limitations of the study

- A theoretical framework was used to underpin the research design and analysis
- It was apparent that data saturation was achieved.
- The research was conducted within one only hospital in the North-East of Scotland; findings are not necessarily transferable to all OPAT clinics in the UK or beyond.
- The study focused solely on patient perspectives and no members of the healthcare team were interviewed.

Key words

OPAT; patient behaviours; qualitative research methods

## Introduction

Outpatient parenteral antibiotic therapy (OPAT) is a treatment option in patients who require parenteral antibiotic administration and are clinically well enough not to require an overnight hospital stay.[1] OPAT was first described in the United States (US) in the early 1970s for treatment of infectious exacerbations of cystic fibrosis,[2] and is now an option for management of diverse infections and patient populations. A model of care involves administration of intravenous (IV) antibiotics within the home setting (by a trained patient, carer or, health professional).[2]

The expansion of OPAT worldwide has been driven by factors including: a drive for more cost-effective use of resources; reduced risks of health-care acquired infection; alignment with the philosophy of patient driven care; an aim to achieve high levels of patient acceptability and satisfaction; and improved quality of life. Evidence of these outcomes has been derived from a systematic review of the cost effectiveness of OPAT highlighting OPAT is cost-effective without increasing patient complications. [3] A narrative review of studies concluded that patients prefer home administration allowing continuation of daily activities.[2] Other cohort studies showed no increased risk of developing health-care acquired infections, particularly *Clostridium difficile*. [4-6] Further evidence concluded there are no additional risks of patient home self-administration of antibiotics compared to hospital administration. [2,7-9]

Several organisations have disseminated guidance and consensus practice statements for OPAT, promoting safe and effective care. [2,10] The British Society of Antimicrobial Chemotherapy (BSAC) launched a number of related initiatives including the National Outcomes Registry System (NORS).[11] Audit data from NORS for 2015 are available for ten OPAT centres in England. No OPAT centres in Scotland are registered with NORS.[12]

Within the North-East of Scotland, an OPAT clinic was established in a major teaching hospital in 1999 to deliver and co-ordinate OPAT administration to patients. This includes OPAT self-administration within the home setting or, for those who opt for health professional administration, treatment is given at the teaching hospital clinic or at a local health-care setting. While other centres in Scotland are reporting increased uptake of home self-administration,[5] uptake in this centre has decreased from 53% in 2006 to 15% in 2013 and 24% in 2015.

*OPAT- perspectives of patient who do not self-administer*

[personal communication] There is a need to investigate the low uptake here with a potential to develop and implement a behaviour change intervention to increase home self-administration.

Such behaviour change interventions are likely to be deemed 'complex' since there are '*several interacting components*'. The UK Medical Research Council (MRC) guidance on '*Developing, Implementing and Evaluating Complex Interventions*' suggest a four stage process; the first is intervention development.[13] Consideration of role of cognitive, behavioural and organisational theories in this phase is emphasised; this will generate an intervention with a '*coherent theoretical basis*' which is more likely to be effective and bring about sustained change.[13]

The Theoretical Domains Framework (TDF) is a framework of theories of behaviour change. To overcome the challenge of selecting the most appropriate theory from the vast number available, TDF was developed, aiming to '*... simplify and integrate a plethora of behaviour change theories and make theory more accessible to, and usable by, other disciplines*'. [14] It is organised into 14 overarching domains and has been used increasingly to explore behaviours in various clinical settings.[15]

This study aimed to use a theoretical approach to understand the determinants of behaviour in patients who are not home self-administering antibiotics.

## Method

### *Design*

This was a qualitative study comprising face-to-face semi-structured interviews.

### *Setting*

The study was conducted in an OPAT clinic in a 900 bedded hospital in the North-East of Scotland. Patient flow within this clinic is at Figure 1.

Around 150 patients per year attend the clinic. (Table 1). Duration of antimicrobial therapy varies from a few days to 4-6 weeks depending on the condition.

*OPAT- perspectives of patient who do not self-administer***Table 1: Demographics of patients referred for OPAT in 2015 [personal communication]**

|                                     |             |
|-------------------------------------|-------------|
| <b>Number of patients</b>           | <b>147</b>  |
| <b>Number of OPAT episodes</b>      | <b>3790</b> |
| <b>Diagnosis</b>                    |             |
| Skin and soft tissue infection      | 45          |
| Spinal abscess/discitis             | 35          |
| Joint infection                     | 24          |
| Osteomyelitis                       | 19          |
| Bronchiectasis                      | 16          |
| Lyme disease                        | 7           |
| Urinary tract infection             | 1           |
| <b>Administration</b>               |             |
| Administered in clinic              | 76          |
| Administered in community hospital  | 36          |
| Administered by self                | 35          |
| <b>Duration of treatment (days)</b> |             |
| 0-7                                 | 39          |
| 8-14                                | 26          |
| 15-21                               | 15          |
| 22-28                               | 17          |
| ≥28                                 | 50          |

*OPAT- perspectives of patient who do not self-administer**Patient and public involvement*

Patients were not involved in the design of this research.

*Participant inclusion and exclusion criteria*

Patients were included if they were: found to be suitable for OPAT by clinic OPAT nurse and specialist infectious diseases consultants; requiring intravenous antibiotics for a period exceeding seven days; were not home self-administering IV antibiotics.

Patients were excluded if they: were 16 years or under; deemed by the OPAT nurse as having no capacity to provide informed consent; had limited understanding of English; or had special communication needs as deemed by clinic team.

The sampling was purposive and all patients meeting the inclusion criteria who attended the clinic over the study period were included (Feb–July 2015). An initial sample size of ten was aimed for with sampling then continued until a point of saturation was reached at which no new themes emerged from three consecutive interviews.[16]

*Recruitment*

The OPAT nurse discussed the study with patient face-to-face and provided patients who were interested and meeting the inclusion criteria with a study information pack. Written, informed consent was obtained from all patients who agreed to participate. Participants were allowed to withdraw from the study at any point during the interview and up to 7 days after.

*Development of interview schedule*

The semi-structured interview schedule was based on the 14 domains of TDF, with core questions and probes to allow an in-depth understanding of the determinants relating to their decision to not self-administer.[14] The schedule was reviewed for credibility by members of the research team providing breadth of expertise in medicine, pharmacy, behavioural psychology and research.[17]

Core questions and links to TDF domains are provided in Table 2.



*OPAT- perspectives of patient who do not self-administer*

Two pilot interviews were conducted to establish patient understanding of interview questions and duration; no changes were made.

For peer review only

*OPAT- perspectives of patient who do not self-administer***Table 2: Interview schedule – the questions are underpinned by TDF and all 14 domains were covered in the development of the interview schedule; some questions cover multiple domains [14]**

| TDF Domain                                                                                                                                                       | Relevant question/s                                                                                                                                                                                                                                                                                                                                                  |
|------------------------------------------------------------------------------------------------------------------------------------------------------------------|----------------------------------------------------------------------------------------------------------------------------------------------------------------------------------------------------------------------------------------------------------------------------------------------------------------------------------------------------------------------|
| <b>Knowledge:</b> An awareness of the existence of something                                                                                                     | Can you briefly describe to me why you are on antibiotics?<br>Can you tell me the name of the antibiotic and for how long you have been prescribed this?<br>Can you describe to me the different alternatives that may be used to inject the antibiotics? E.g. coming to the clinic daily                                                                            |
| <b>Skills:</b> An ability or proficiency acquired through practice                                                                                               | Do you feel you have the necessary: <ul style="list-style-type: none"> <li>• Knowledge</li> <li>• Experience</li> <li>• Skills</li> <li>• Confidence</li> </ul> to self-inject at home? If not, why? What would enhance this? E.g. Further training, meeting up with patients who have successfully self-injected, further discussion with health care professionals |
| <b>Social/Professional Role and Identity:</b> A coherent set of behaviours and displayed personal qualities of an individual in a social or work setting         | Is injecting of antibiotics only a nurse or a doctors' role? Why? Is there a role for others such as patients, relatives, carers to inject at home? Why?                                                                                                                                                                                                             |
| <b>Beliefs about Capabilities:</b> Acceptance of the truth, reality, or validity about an ability, talent, or facility that a person can put to constructive use | Do you feel you have the necessary: <ul style="list-style-type: none"> <li>• Knowledge</li> <li>• Experience</li> <li>• Skills</li> <li>• Confidence</li> </ul> to self-inject at home? If not, why? What would enhance this? Eg. Further training, meeting up with patients who have successfully self-injected, further discussion with health care professionals  |

*OPAT- perspectives of patient who do not self-administer*

|                                                                                                                                                                                        |                                                                                                                                                                                                                                                                                                                                                                                                                                                                           |
|----------------------------------------------------------------------------------------------------------------------------------------------------------------------------------------|---------------------------------------------------------------------------------------------------------------------------------------------------------------------------------------------------------------------------------------------------------------------------------------------------------------------------------------------------------------------------------------------------------------------------------------------------------------------------|
| <p><b>Optimism:</b> The confidence that things will happen for the best or that desired goals will be attained</p>                                                                     | <p>Did you consider the impact on yourself and others (hospital staff, family etc.) when making the decision?</p>                                                                                                                                                                                                                                                                                                                                                         |
| <p><b>Beliefs about Consequences:</b> Acceptance of the truth, reality, or validity about outcomes of a behaviour in a given situation</p>                                             | <p>Do you think you are likely to be cured better if your antibiotics are administered at hospital? Why?</p> <p>What do you think might have happened if you had chosen to inject at home? E.g. consequences to yourself (including curing your infection), family etc. Is there anything that could help you overcome the problems and difficulties you have mentioned? E.g. relative, more time training, overseeing injecting</p>                                      |
| <p><b>Reinforcement:</b> Increasing the probability of a response by arranging a dependent relationship, or contingency, between the response and a given stimulus</p>                 | <p>What might be done differently to encourage more people to inject at home? Based on all issues, what is the most important thing that health care professionals could have done to encourage you to inject at home</p>                                                                                                                                                                                                                                                 |
| <p><b>Intentions:</b> A conscious decision to perform a behaviour or a resolve to act in a certain way</p>                                                                             | <p>Did you consider the impact on yourself and others (hospital staff, family etc.) when making the decision?</p>                                                                                                                                                                                                                                                                                                                                                         |
| <p><b>Goals:</b> Mental representations of outcomes or end states that an individual wants to achieve</p>                                                                              | <p>How does coming to hospital fit in with your daily routine? Are there situations where other things you have to do have interfered with coming to hospital?</p>                                                                                                                                                                                                                                                                                                        |
| <p><b>Memory, Attention and Decision Processes:</b> The ability to retain information, focus selectively on aspects of the environment and choose between two or more alternatives</p> | <p>Describe to me how you made the decision to come to hospital for your antibiotic treatment rather than injecting at home. Was it an easy decision to make?</p> <p>Do you feel you were in charge of making that decision and why?</p> <p>What situations may cause you to forget/decide not to inject the antibiotic if you were injecting at home? (E.g. time constraints, the presence of others, cleanliness, supplies, small children, risk of infection etc.)</p> |

*OPAT- perspectives of patient who do not self-administer*

|                                                                                                                                                                                                                                            |                                                                                                                                                                                                                                                                                                                                                                                                                                           |
|--------------------------------------------------------------------------------------------------------------------------------------------------------------------------------------------------------------------------------------------|-------------------------------------------------------------------------------------------------------------------------------------------------------------------------------------------------------------------------------------------------------------------------------------------------------------------------------------------------------------------------------------------------------------------------------------------|
| <p><b>Environmental Context and Resources:</b> Any circumstance of a person's situation or environment that discourages or encourages the development of skills and abilities, independence, social competence, and adaptive behaviour</p> | <p>How does hospital administration help meet your personal needs? (E.g. interaction with other patients, support from clinic staff, reassurance that you are seeing medical staff regularly)</p> <p>How would injecting at home fit in with your daily routine?</p>                                                                                                                                                                      |
| <p><b>Social Influences:</b> Those interpersonal processes that can cause individuals to change their thoughts, feelings, or behaviours</p>                                                                                                | <p>Did others influence your decision to come to hospital? How? (Prompts family, friends, work colleagues, other patients, hospital staff (name staff), others who have injected at home?) Did they think it was a good or a bad idea? Did they agree with your decision and why?</p> <p>Who had the final say in making the decision about injecting at home?</p>                                                                        |
| <p><b>Emotion:</b> A complex reaction pattern, involving experiential, behavioural, and physiological elements, by which the individual attempts to deal with a personally significant matter or event</p>                                 | <p>How do you feel about self-injecting at home? What are the main things you would like/dislike about self-injecting at home? Does injecting at home cause you to worry? What specific concerns does it raise?</p> <p>How do you feel about receiving your antibiotics in hospital? What are the main things you like/dislike about coming to hospital? Do you worry about coming to hospital? What specific concerns does it raise?</p> |
| <p><b>Behavioural Regulation :</b> Anything aimed at managing or changing objectively observed or measured actions</p>                                                                                                                     | <p>What would encourage you to inject at home in the future if antibiotics were needed again? (E.g. more training/support, meeting other patients who have self-injected successfully, having a relative/carer self-inject)</p>                                                                                                                                                                                                           |

### *Data collection*

Interviews were conducted within the OPAT clinic by GA, a researcher with considerable experience and expertise in conducting interviews, and recorded digitally, with ongoing verbatim transcription of audio-recordings to allow for identification of data saturation. All transcripts were checked for accuracy by an independent member of the research team (AT).

### *Data analysis*

Transcripts were analysed independently by two researchers (GA, AT) using the Framework Approach following the steps of: data familiarisation; identifying constructs; indexing; charting; mapping; and interpreting.[18] TDF was used as the coding framework to allow elucidation of the behavioural determinants. The coding of the first two interviews was reviewed by a third member of the research team (KFM). Any disagreements were resolved by discussing with a third member of the team (KFM).

### *Research governance*

Approval was obtained from the NHS Ethics Committee East Midlands–Nottingham 1 (14/EM/1197) and NHS Grampian Research and Development Office (2014RG007).

*OPAT- perspectives of patient who do not self-administer*Results*Demographics*

Twenty patients were approached; all agreed to be interviewed. Interviews were between 30-45 minutes long. The mean age was 54 years (SD  $\pm$ 17.6 years); 13 were male and most (n=19) were at least in their second or third week of IV antibiotic treatment. Just under half (n=9) were being treated for a bone and joint infection (Table 3).

For peer review only

**Table 3: Demographics in patients included in study**

|     | <b>Gender</b> | <b>Age Range<sup>a</sup></b> | <b>Any comorbidities</b>        | <b>Indication for IV antibiotic therapy</b> | <b>Week of treatment</b>    |
|-----|---------------|------------------------------|---------------------------------|---------------------------------------------|-----------------------------|
| P1  | F             | 51-60                        | No                              | Spinal infection – bone and joint           | 3 <sup>rd</sup> week        |
| P2  | M             | 41-50                        | No                              | Osteomyelitis in finger                     | End of 1 <sup>st</sup> week |
| P3  | F             | 31-40                        | Type 1 diabetic                 | Discitis                                    | 2 <sup>nd</sup> week        |
| P4  | M             | 21-30                        | No                              | Knee septic arthritis                       | 3 <sup>rd</sup> week        |
| P5  | F             | 61-70                        | No                              | Hip prosthetic joint infection              | 3 <sup>rd</sup> week        |
| P6  | M             | 61-70                        | No                              | Cellulitis in leg                           | 2 <sup>nd</sup> week        |
| P7  | M             | 71-80                        | No                              | Osteomyelitis in toe                        | 3 <sup>rd</sup> week        |
| P8  | M             | 61-70                        | No                              | Knee infection following total replacement  | 3 <sup>rd</sup> week        |
| P9  | M             | 71-80                        | No                              | Osteomyelitis in toe                        | 2 <sup>nd</sup> week        |
| P10 | F             | 61-70                        | No                              | Osteomyelitis in tibia                      | 2 <sup>nd</sup> week        |
| P11 | M             | 71-80                        | Type 1 diabetic                 | Cellulitis in leg                           | 2 <sup>nd</sup> week        |
| P12 | M             | 41-50                        | No                              | Cellulitis and bursitis in elbow            | 2 <sup>nd</sup> week        |
| P13 | M             | 61-70                        | Liver cirrhosis (non alcoholic) | Lung disease – Mycobacterium infection      | 6 <sup>th</sup> week        |
| P14 | F             | 61-70                        | No                              | Osteomyelitis in toe                        | 5 <sup>th</sup> week        |
| P15 | M             | 31-40                        | No                              | Infective endocarditis                      | 2 <sup>nd</sup> week        |
| P16 | M             | 61-70                        | Type 2 diabetic                 | Infected cannula site - cellulitis          | 2 <sup>nd</sup> week        |
| P17 | M             | 41-50                        | No                              | Discitis                                    | 3 <sup>rd</sup> week        |
| P18 | M             | 17-18                        | No                              | Infective endocarditis                      | 3 <sup>rd</sup> week        |
| P19 | F             | 41-50                        | No                              | Cellulitis in leg                           | 2 <sup>nd</sup> week        |
| P20 | F             | 51-60                        | No                              | Cellulitis in leg                           | 3 <sup>rd</sup> week        |

<sup>a</sup> The participant age have been reported in age ranges to ensure patient is not identifiable

*OPAT- perspectives of patient who do not self-administer*

Key themes are described in relation to TDF domains.

**Domain 1: Knowledge**Lack of knowledge of options available for self-administration

For all patients, there appeared to be a lack of knowledge of options available, including the possibility to self-administer IV antibiotics at home.

*"... they could have asked me as I told them I was a nurse ... they could teach me what I needed to know to do these at home."* P20

In fact, when aware of this option, some patients indicated that they would have been keen to learn how to self-administer.

*"Please you must show me and I can learn. Please can you teach me as it will be better and (do) no(t) have come in here everyday and for the money as well ... help me get back to work ..."* P15

**Domain 2: Skills**Patient perceptions of own skills to self-administer

Some perceived themselves as having necessary skills to self-administer, gained in various ways including observation of staff at OPAT clinic, past or present experiences with self-administration of injections and past training. This made the patients more willing to self-administer antibiotics at home in the future should the option be available.

*"Well you see it [self-administration] should be fairly simple ... just remove the cap here and flush it and connect it push it in here to this and let it drip in slowly and then the alarm goes off and press stop and take the tube that connects to the machine and flush again .... It's easy, just like plumbing!"* P13

A few identified specific skills they required to gain to pursue home self-administration of antibiotics.

*"... more practice and how to flush the cannula and make sure it is not blocked."* P2

**Domain 3: Social/Professional Role and Identity**

Some patients believed that it was not appropriate for them to self-administer and that this was the role of health-care professionals. This influenced their decision to attend hospital rather than self-administer.



*OPAT- perspectives of patient who do not self-administer*

1  
2  
3 "... Folk are nae [not] trained like hospital staff ... so I would say leave this for  
4 the experts" P11  
5

6 Many expressed confidence in the OPAT nurse.

7  
8 "Even if they [family members] did I would not trust them. She [OPAT nurse] is  
9 very good and does it quick and I know it's safe." P1  
10  
11

**Domain 4: Beliefs about capabilities**Belief/lack of in own abilities

12  
13  
14  
15  
16 Many patients perceived themselves as being competent.

17  
18 "... So I don't think giving the right dosage; I don't think this would be an issue  
19 at all. I could cope with that" P5  
20  
21

22 These patients felt confident in their own capabilities should they be given the  
23 opportunity to be shown, taught and practice prior to self-administering at home.

24  
25 However, some were lacking in self-confidence and did not believe they were  
26 capable of self-administration, citing reasons including complex and difficult home  
27 circumstances, and physical inability to self-administer.

28  
29 "...The trouble is ... I have the jitters and my doctors know about that as well ...  
30 I don't know why I have this I have this jittering in my legs and some jittering in  
31 my arms. P8  
32  
33

**Domain 5: Belief about consequences**Belief that it is safer to have antibiotics administered in hospital

34  
35  
36  
37  
38 Administration of antibiotics in hospital provided some patients with reassurance  
39 that a knowledgeable health-care professional was administering their therapy  
40 and perceived this as being a safer option to self-administration. Others felt secure  
41 that hospital was a cleaner environment than home. This encouraged patients to  
42 choose hospital administration over self-administration.  
43  
44  
45

46 "I thought it would be a lot safer to do them here in the hospital ... I think  
47 hospitals are cleaned every day with antibacterials and the nurses wear gloves  
48 and use the gel so in that respect hospitals are much more cleaner and a much  
49 safer environment." P18  
50  
51

52 Some patients cited potential negative consequences if they self-administered.

53  
54 "The thing that really worries me about doing it at home is getting an infection."  
55 P17  
56  
57

58 Others remarked that it was likely to make no difference in terms of consequences  
59 whether the antibiotic was self-administered at home or in hospital by a healthcare  
60 professional.

*OPAT- perspectives of patient who do not self-administer*

1  
2  
3 *"They [antibiotics] would work exactly the same as it's the same stuff and given*  
4 *the same way."*P13  
5

6 Belief that self-administration could potentially improve quality of life

7  
8  
9 Some patients thought that self-administration would facilitate their return to work  
10 since it would no longer be necessary to attend hospital on a daily basis.

11  
12 *"See like if I could do it myself like then it could work around better and it would*  
13 *help a lot with getting back to work ... as they say no work no pay."*P3  
14

15 Home self-administration was also considered to potentially have a positive impact  
16 on patient quality of life, including social life and having less impact on the rest of  
17 the family.  
18

19  
20 *"Coming in to hospital is a pain sometimes as I get job interviews and have turned*  
21 *down some of these as I'm coming here and I often cancel friends' invites so I can*  
22 *come to the hospital."* P2  
23

24  
25 Spending less time travelling was an incentive for patients to self-administer.

26  
27 *"Well I don't know other than it would save the journey in you see I live away out*  
28 *in XXX so it would save a long trip here and back."*P7  
29

30 In some cases, driving into hospital was also impacting other family members  
31 negatively.  
32

33  
34 *"Oh yeah because you would not need to rely on other people to take you in here.*  
35 *Normally my dad, who is a taxi driver takes me but he is losing the chance of*  
36 *making a fare every time he comes in with me."*P19  
37

38 **Domain 6: Environment context and resources**

39  
40 Lack of parking availability in hospital premises

41  
42 A lack of parking availability within the hospital grounds and the distance required  
43 to reach the clinic were also cited as encouraging self-administration.  
44

45  
46 *"I had to walk from the rotunda [side entrance of the hospital], up the passage*  
47 *way to the lifts and I was a bit shaky by the time I got to the lift."* P16  
48

49 Complex home circumstances

50  
51 Issues relating to patients' dependents were also factors which would encourage  
52 self-administration.  
53

54  
55 *"Aye tell me about ... it's a bit of nightmare [coming into hospital daily]. We also*  
56 *have a two year old so my partner she works as well."* P3  
57  
58  
59  
60

*OPAT- perspectives of patient who do not self-administer*

Just as home circumstances were a potential facilitator to home self-administration, patients also cited dependents and other home circumstances as being the reason behind the decision to opt out of self-administration.

" ... You see it's complicated; my husband, he has dementia and takes up all my time." P1

One patient was required to attend hospital to have investigations as well as antibiotic administration making it more convenient to opt for hospital administration.

"I think it's more convenient to get everything done at the same time antibiotics, blood tests ... " P13

Another patient discussed his self-employment allowed flexibility in his daily schedule which discouraged him from self-administering.

"It does not bother me [coming in] cause it's my own business so I'm the boss ... I can be totally flexible and can come in any time of the day." P12

**Domain 7: Emotions**Anxiety and stress associated with self-administration

A number of patients felt that self-administration would be a complex task that would be too stressful leading to considerable anxiety including a fear of using and handling needles.

"I would consider it but I would never have the confidence to do it ... if I had to use a needle I would not do it. I'm petrified of needles." P6

Concern about potential complications and consequences of self-administration also acted as a barrier to learning to self-administer antibiotics.

"It's not the learning so much it's the doing and what to do if it goes wrong. What about if it [the antibiotic] goes in the wrong place? ... I feel sick ..." P1

Importance of staff reassurances and encouragement

Some patients stressed the importance of hospital staff potentially exerting a positive effect calming patients' stresses and anxieties by providing reassurance during the training process.

"The most important thing though is to have the staff like you to do it [training] right and support and instil confidence in their patients". P20

**Domain 8: Memory, Attention & Decision Process**Patient involvement in decision making

*OPAT- perspectives of patient who do not self-administer*

This domain involved the decision making and factors involved in patients choice between ways of administration. Many patients indicated that they were not involved and consulted in deciding whether to attend hospital or self-administer with decision to come to hospital made by hospital staff.

*"Well I didn't get to make that choice. I was just told that I was going to get this treatment and that I would need to come into hospital three times a week to get these infusions and that was it."*P18

Despite lack of involvement in the decision making process, most expressed confidence in the healthcare professionals' abilities and judgements.

*"I would say the doctor did whatever was best for my situation."* P4

**Domain 9: Social influences**

A number of patients indicated that hospital health-care professionals suggested that it would be the better option for them if they attended hospital for administration of antibiotics. They did not question this suggestion in the belief that the healthcare professionals were right.

*"... I'm an 80 year old so I just do whatever they [doctors] say."* P11

A patient indicated that his wife was the main influence encouraging him to attend the hospital for administration,

*"my wife ... she prefers me to come in here as she always worries about me"*.P13

Another patient preferred the social aspect of attending a site outwith his home for administration.

*"No I'm happy to come in here, it gets me out gets me walking a little bit further."* P4

A patient described attending hospital as more rewarding from a social aspect and this encouraged him to choose hospital administration as opposed to developing the skills to self-administer.

*"Well its fine it's a trip in and I meet some nice people and I'm coming anyway for my radiotherapy ... I come in the patient transport."* P7

**Domain 10: Behavioural regulation**Experiences gained through attending OPAT clinic

All patients had been attending the OPAT clinic for antibiotic administration for a number of days. Some indicated that following experiences of attending on a daily basis, they would still opt to attend the clinic given the choice in the future.

*"If you have got someone in my situation it may not be feasible for them to do it at home."* P14

*OPAT- perspectives of patient who do not self-administer*

Others indicated that based on this experience, they would consider learning and training self-administration of antibiotics choosing this option in the future.

*"... they could teach me what I needed to know to do these at home and this would have reduced my stress levels I mean stress with childcare for my autistic son..."* P20

Information about these domains did not emerge from the available dataset: optimism, reinforcement, intentions and goals.

Barriers and facilitators to home self-administration emerging from this research have been summarised in Table 4.

For peer review only

*OPAT- perspectives of patient who do not self-administer***Table 4: Barriers and facilitators to home self-administration**

| <b>TDF Domain</b>                             | <b>Subtheme/s</b>                                                         | <b>Facilitators</b> | <b>Barriers</b>   |
|-----------------------------------------------|---------------------------------------------------------------------------|---------------------|-------------------|
| <b>Knowledge</b>                              | Lack of knowledge of potential options available for self-administration  |                     | √                 |
| <b>Beliefs of capabilities</b>                | Belief and confidence in own abilities                                    | √                   |                   |
|                                               | Lack of confidence in own abilities                                       |                     | √                 |
| <b>Skills</b>                                 | A perception that have necessary skills to self-administer                | √                   |                   |
| <b>Social/Professional Role and identity</b>  | Belief that not role of patient to self-administer                        |                     | √                 |
| <b>Beliefs about consequences</b>             | Belief that safer to administer in hospital                               |                     | √                 |
|                                               | Belief that self-administration could potentially improve quality of life | √                   |                   |
| <b>Environmental context/resources</b>        | Lack of parking on hospital grounds                                       | √                   |                   |
|                                               | Complex home circumstances                                                | √<br>(dependents)   | √<br>(dependents) |
| <b>Emotions</b>                               | Anxiety and stress associated with self-administration                    |                     | √                 |
|                                               | Staff reassurances, encouragement, support and training                   | √                   |                   |
| <b>Social influences</b>                      | Influences of family/friends                                              |                     | √                 |
| <b>Memory, attention and decision process</b> | Lack of patient involvement in decision making                            |                     | √                 |
| <b>Behavioural regulation</b>                 | Experiences gained through attending OPAT clinic                          | √                   | √                 |

## Discussion

To our knowledge, this is the first study adopting a qualitative methodology to explore the understanding, beliefs and attitudes of patients who are not self-administering IV antibiotics. Key findings are that from the patients' perspectives, the main determinants that appeared to impact their decision not to self-administer were lack of knowledge of available options, a perception that hospital staff are better trained, and anxieties of potential complications of self-administration. The main determinants that emerged as potentially encouraging patients to self-administer included the perceptions of being sufficiently knowledgeable, skilful and competent, and that self-administration afforded the potential to work whilst receiving treatment. Patient experiences and awareness of options of OPAT administration were likely to impact future choices of self-administration. The novelty of the approach used in this research makes it difficult to compare to conclusions from other research, whether from the UK or out-with. To this effect, the discussion will focus on suggesting a number of interventions to overcome the barriers identified through this research and which are based on evidence based behavioural change techniques. Overall, the interventions are aimed at promoting improvement in OPAT service delivery.

There are several strengths including use of a theoretical framework to underpin research design and analysis, and the measures taken to promote research trustworthiness, particularly the elements of credibility and dependability, enhancing research rigour.[13,14,19] Furthermore, data saturation was apparent. There are, however, limitations to the study. The research was conducted within one hospital in the North-East of Scotland; findings are not necessarily transferable to all OPAT clinics in the UK or beyond. While there were attempts to promote credibility of findings such as having an interviewer who was not a member of the healthcare team, it is possible that some patients may not have been truthful. The study also focused solely on patient perspectives and no members of the healthcare team were interviewed. Patients were interviewed if they were deemed suitable for self-administration by the team rather than based on whether or not they were provided the option of self-administration. Despite

*OPAT- perspectives of patient who do not self-administer*

1  
2  
3 these limitations, this qualitative research has added to the very limited evidence  
4 base around behavioural determinants influencing a patient's decision to self-  
5 administer IV antibiotics.  
6  
7

8  
9 This study has elucidated the behavioural determinants acting as facilitators or  
10 barriers to self-administration which can act as targets for any intervention,  
11 promoting self-administration. The interventions suggested here will focus on  
12 the barriers rather than facilitators since these are the interventions most likely  
13 to increase uptake of self-administration. Patient-centred, tailored interventions  
14 may incorporate one or more behaviour change techniques (BCTs), described as  
15 processes that are likely to change behaviour. Michie et al mapped a number of  
16 evidence-based BCTs to specific TDF domains, highlighting the importance of  
17 considering theory as part of intervention development as articulated in the UK  
18 MRC guidance.[13,20]  
19  
20  
21  
22  
23  
24  
25

26 Lack of belief in capabilities was a barrier to self-administration and resulted in  
27 lack of confidence in patient's own abilities to self-administer. The mapped BCT  
28 '*graded tasks*' may be implemented, where patients are initially set easy-to-  
29 perform tasks, followed by more complex tasks, aiming at building up the difficulty  
30 until the patient achieves the target behaviour. This approach may also alleviate  
31 the TDF emotional barriers relating to anxiety, providing reassurance over  
32 potential negative consequences of self-administration and the belief that hospital  
33 administration is safer.  
34  
35  
36  
37  
38  
39

40 While observing patients, the BCT of '*verbal persuasion about capability*', could be  
41 considered whereby reassurance is provided of success, overcoming self-doubt  
42 and increasing self-belief. There is evidence that self-administration will also  
43 empower patients, increase autonomy leading to enhanced satisfaction.[8]  
44  
45  
46  
47

48 Stress was also a major negative emotion acting as a barrier to self-  
49 administration. In addition to skills-based training, BCTs should centre on  
50 emotional wellbeing in the form of '*monitoring of emotional consequences*'.  
51 Patients are encouraged to self-monitor their feelings while attempting self-  
52 administration. '*Emotional social support*' could also be provided via a named  
53 health-care professional, website or smartphone technology, which has had  
54 success in patients receiving home dialysis.[21]  
55  
56  
57  
58  
59  
60



*OPAT- perspectives of patient who do not self-administer*

1  
2  
3 There is a drive within healthcare services to involve patients in decision making  
4 taking on a person-centred approach. However, in this group of patients, though  
5 patients were praising of hospital staff, there appears to be a lack of involvement  
6 of patients in the decision making process. Involvement of patients in decision  
7 making and the need for individualised discussions with patients on what is the  
8 better option for them should be encouraged and maybe an intervention targeted  
9 at health-care professionals rather than patients.  
10  
11  
12  
13  
14

15  
16 Whilst the interventions based on BCTs being suggested are taking into account  
17 most barriers to self-administration emerging in this research, in a few cases, it  
18 may be in the patient's interest to attend the OPAT clinic e.g. patients with  
19 complex home circumstances.  
20  
21  
22

23 A large number of patients in this research showed a lack of knowledge of self-  
24 administration as a potential option for administering IV antimicrobials. This is  
25 despite the fact that it is routine practice to provide home self-administration as  
26 an option to suitable patients. Aspects such as recall bias and social desirability  
27 bias linked to the patients' responses need to be considered. Keeping in mind that  
28 this from a patient perspective, a number of factors associated with the system,  
29 mainly the lack of resource available, may be a major contributor to this. There is  
30 one nurse caring for approximately 150 patients annually; however current  
31 experience indicates that one nurse should care for 100 patients annually and  
32 having a larger ratio can have an impact on the ability of staff to assess patients  
33 for suitability of OPAT in a timely manner (Personal communication Greater  
34 Glasgow and Clyde). The lack of resource makes it impossible for the nurse to  
35 provide the sufficient one-to-one training that is initially relatively intense but that  
36 has been described in the literature as providing success in allowing patients to  
37 safely self-administer at home.[9] The investment in the resource may then be  
38 offset by the patient being discharged home and efficiently planned in a way that  
39 training is commenced when the patient is still a hospital inpatient. Additional  
40 resource such as equipment (example, infusion pumps) that patients may be  
41 provided with at home, also need to be considered to enable an increase in self-  
42 administration uptake rate.  
43  
44  
45  
46  
47  
48  
49  
50  
51  
52  
53  
54  
55  
56

57 Overall this study shows that patients are very appreciative of the skills and  
58 expertise of healthcare professionals within the OPAT clinic. However, the study  
59  
60

*OPAT- perspectives of patient who do not self-administer*

1  
2  
3 indicates that this expertise needs to shift so that skills and confidence are  
4 transferrable to patients through interventions based on BCTs. Though an initial  
5 investment in resource is required (including increased manpower and  
6 equipment), this will be offset in a number of ways particularly if training is  
7 commenced during the patient's planned inpatient stay.[9] More emphasis needs  
8 to be placed on informing the patients of the option of self-administration. To  
9 enhance the success of development of this complex intervention, further work is  
10 required to explore the views and perceptions of healthcare professionals to  
11 ensure that the development and implementation of any intervention is successful.  
12 Such research will also enable exploration of health-care professionals being  
13 potential barriers or facilitators to self-administration. The hesitancy of health-  
14 care professionals to initiate self-care has been shown as a major barrier in a small  
15 scale US study as opposed to a patient reluctance to take on self-care. [22]

16  
17 It is likely that in the near future, a more integrated approach towards patient  
18 care is adopted combining primary care expertise at home treatment and  
19 secondary care specialist knowledge.[1] An OPAT service is an ideal way of  
20 embracing this. **(4165)**

**ACKNOWLEDGEMENTS**

We would like to acknowledge all the patients who took the time to be interviewed and without whose input this research would not have been possible.

**FIGURE 1**

Schematic representation of patient flow within OPAT clinic

For peer review only

*OPAT- perspectives of patient who do not self-administer***REFERENCES**

- [1] Chapman ALN, Seaton RA, Cooper MA et al. Good practice recommendations for outpatient parenteral antimicrobial therapy (OPAT) in adults in the UK: a consensus statement. *J Antimicrob Chemother* 2012;doi:10.1093/jac/dks003
- [2] MacKenzie M, Rae N, Nathwani D. Outcomes from global adult outpatient parenteral antimicrobial therapy programmes: A review of the last decade. *Int J Antimicrob Agents* 2014;**43**:7-16
- [3] Psaltikidis EM, Silva E, Bustorff-Silva JM et al. Economic analysis of outpatient parenteral antimicrobial therapy (OPAT): a systematic review. *Value in Health* 2015;**18**:A582-83
- [4] Chapman ALN Outpatient parenteral antimicrobial therapy. *BMJ* 2013;**346**:f1585
- [5] Barr DA, Semple L, Seaton RA. Outpatient parenteral antimicrobial therapy (OPAT) in a teaching hospital-based practice: a retrospective cohort study describing experience and evolution over 10 years. *Int J Antimicrob Agents* 2012;**39**:407-13
- [6] Wong KK, Fraser TG, Shrestha NK et al. Low incidence of *Clostridium difficile* infection (CDI) in patients treated with outpatient parenteral antimicrobial therapy (OPAT). *Inf Control & Hosp Epidem* 2015;**36**:doi:10.1017/ice.2014.6
- [7] Barr DA, Semple L, Seaton RA. Self-administration of outpatient parenteral antibiotic therapy and risk of catheter-associated adverse events: a retrospective cohort study. *Eur J Clin Microbiol Infect Dis* 2012;**31**:2611-29
- [8] Matthews PC, Conlon CP, Berendt AR et al. Outpatient parenteral antimicrobial therapy (OPAT): is it safe for selected patients to self-administer at

*OPAT- perspectives of patient who do not self-administer*

1  
2  
3 home? A retrospective analysis of a large cohort over 13 years. *J Antimicrobial*  
4 *Chemother* 2007;**60**:356-62

5  
6  
7  
8 [9] Subedi S, Looke DFM, McDougall DA et al. Supervised self-administration  
9 of outpatient parenteral antibiotic therapy: a report from a large tertiary hospital  
10 in Australia. *Int J Infect Dis* 2015;**30**:161-65

11  
12  
13  
14  
15 [10] Tice AD, Rehm SJ, Dalovisio JR et al. Practice guidelines for outpatient  
16 parenteral therapy. *Clin Infect Dis* 2004;**38**:1651-72

17  
18  
19  
20 [11] British Society for Antimicrobial Chemotherapy. *Outpatient Parenteral*  
21 *Antimicrobial Therapy Initiative* <http://www.bsac.org.uk/opat-landing-page/>

22  
23  
24  
25 [12] British Society for Antimicrobial Chemotherapy. *The National OPAT*  
26 *Outcomes Registry*. <http://opatregistry.com/index.php/auth/login>

27  
28  
29  
30 [13] MRC, Medical Research Council. *Developing and evaluating complex*  
31 *interventions: new guidance*. [https://www.mrc.ac.uk/documents/pdf/complex-](https://www.mrc.ac.uk/documents/pdf/complex-interventions-guidance)  
32 [interventions-guidance](https://www.mrc.ac.uk/documents/pdf/complex-interventions-guidance).

33  
34  
35  
36 [14] Cane J, O'Connor D, Michie S. Validation of the theoretical domains  
37 framework for use in behaviour change and implementation research.  
38 *Implementation Science*. 2012;**7**:doi:10.1186/1748-5908-7-37

39  
40  
41  
42 [15] Phillips CJ, Marshall AP, Chaves NJ et al. Experiences of using the  
43 Theoretical Domains Framework across diverse clinical environments: a  
44 qualitative study. *J Multidiscip Healthc* 2015;**8**: doi: [10.2147/JMDH.S78458](https://doi.org/10.2147/JMDH.S78458)

45  
46  
47  
48 [16] Francis JJ, Johnston M, Robertson C, Glidewell L, Entwistle V, Eccles MP, et  
49 al. What is an adequate sample size? Operationalising data saturation for theory  
50 based studies. *Psychology and Health*. 2009;**10**:1229-45

*OPAT- perspectives of patient who do not self-administer*

1  
2  
3 [17] Patton MQ. *Enhancing the quality and credibility of qualitative analysis*.  
4 HSR: Health Services Research.  
5  
6 [https://www.ncbi.nlm.nih.gov/pmc/articles/PMC1089059/pdf/hsresearch00022-](https://www.ncbi.nlm.nih.gov/pmc/articles/PMC1089059/pdf/hsresearch00022-0112.pdf)  
7  
8 0112.pdf  
9

10  
11  
12 [18] Ritchie J, Lewis J, McNuaghton Nicholls C, et al. *Qualitative research*  
13 *practice: a guide for social science students and researchers*. 2013, London: Sage  
14  
15

16  
17  
18 [19] Shenton AK Strategies for ensuring trustworthiness in qualitative research  
19 projects. *Education for Information*. 2004;**22**:63-75  
20  
21

22  
23  
24 [20] Michie S, Wood CE, Johnstone M et al. Behaviour change techniques: the  
25 development and evaluation of a taxonomic method for reporting and describing  
26 behaviour change interventions (a suite of five studies involving consensus  
27 methods, randomised controlled trials and analysis of qualitative data) *Health*  
28 *Technol Assess* 2015;**19**: 99  
29  
30  
31  
32

33  
34  
35 [21] Combes G, Allen K, Sein K et al. Taking hospital treatments home: a mixed  
36 methods case study looking at the barriers and success factors for home dialysis  
37 treatment and the influence of a target on uptake rates *Implementation Science*  
38 2015;**10**:doi 10.1186/s13012-015-0344-8  
39  
40  
41  
42

43 [22] Agrawal D, Ganguly A, Bhavan PB. Capturing the patient voice. Patients  
44 welcome IV self-care; Physicians hesitate. [http://catalyst.nejm.org/patients-](http://catalyst.nejm.org/patients-welcome-iv-antibiotics-self-care/;2017)  
45 [welcome-iv-antibiotics-self-care/;2017](http://catalyst.nejm.org/patients-welcome-iv-antibiotics-self-care/;2017) [accessed 23 May 2018]  
46  
47  
48  
49  
50  
51  
52  
53  
54  
55  
56  
57  
58  
59  
60

*OPAT- perspectives of patient who do not self-administer*Author's contribution**All authors have been involved in:**

- Substantial contributions to the conception or design of the work; or the acquisition, analysis, or interpretation of data for the work; AND
- Drafting the work or revising it critically for important intellectual content; AND
- Final approval of the version to be published; AND
- Agreement to be accountable for all aspects of the work in ensuring that questions related to the accuracy or integrity of any part of the work are appropriately investigated and resolved.

Antonella Tonna: Principal investigator, involved in all aspects.

Geraldine Anthony: Research fellow, involved in all aspects but mainly interviewing of patients, transcribing, data analysis, draft if work.

Ivan Tonna, Rob Laing, Alexander McKenzie: Consultant infectious diseases physicians on site where study conducted. They lead mainly on conception of work, identifying the need for this research.

Vibhu Paudyal, Katrina Forbes-McKay: Involved mainly in design of work, particularly in development of theoretical basis for development of topic guide; analysis of data based on theoretical framework.

Sharon Falconer: Lead nurse at OPAT clinic. Lead mainly on conception of work, recruitment of patients

Gillian McCartney: Antimicrobial pharmacist. Lead mainly on conception of work, analysis of data

Derek Stewart: Involved in all aspects overseeing the quality of the work. Closely involved in conception and analysis and revising the final version for intellectual content.

Transparency decalaration/Competing interests

All authors confirm that there are no conflicts of interest to declare.

Funding

This work was supported by an NHS Grampian Endowment Fund (Project number 14/14). The funding body had no involvement with study design.

*OPAT- perspectives of patient who do not self-administer*Data sharing statement

Due to confidentiality and need to protect the patient identity, there is no further data to share.

For peer review only



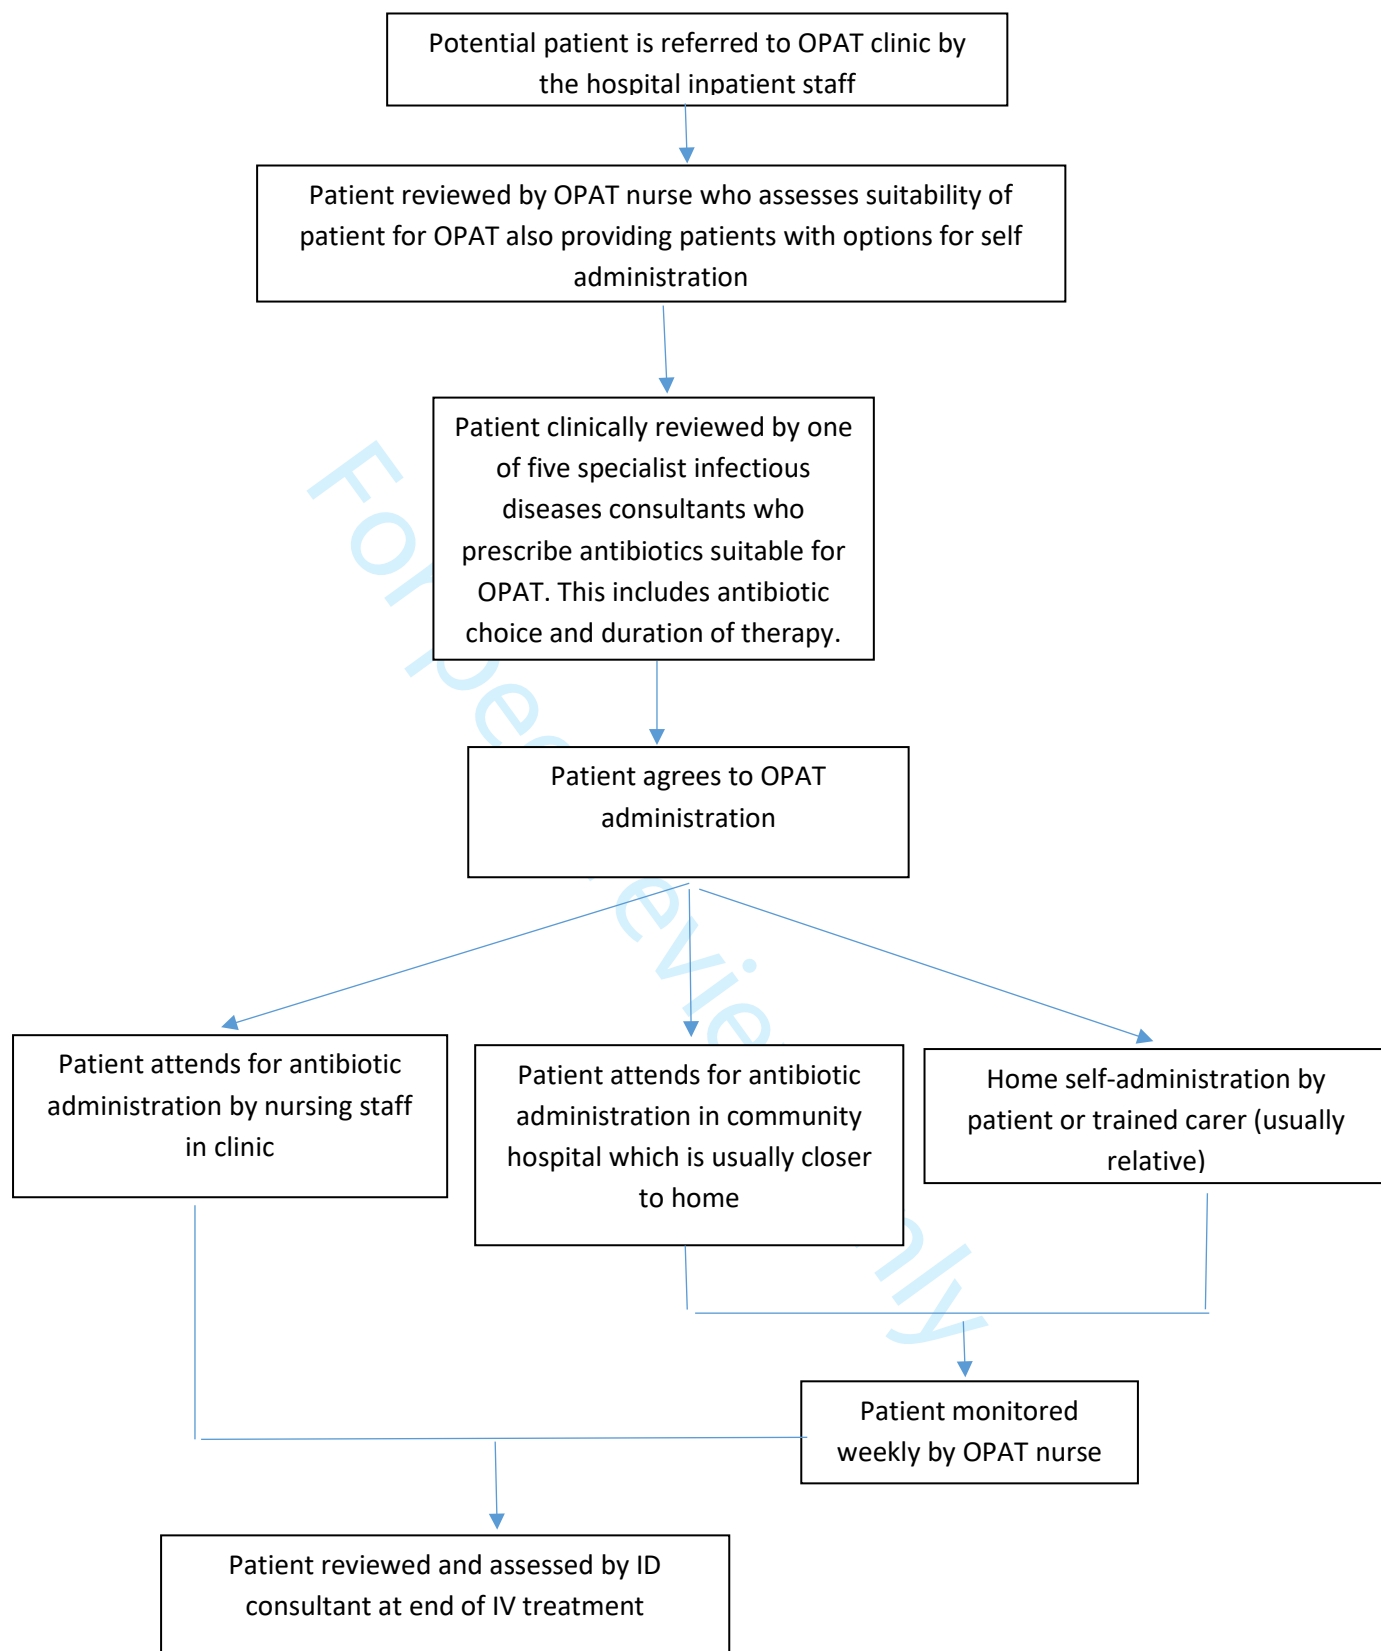

**Figure 1: Schematic representation of patient flow within OPAT clinic**

## COREQ (CONsolidated criteria for REporting Qualitative research) Checklist

A checklist of items that should be included in reports of qualitative research. You must report the page number in your manuscript where you consider each of the items listed in this checklist. If you have not included this information, either revise your manuscript accordingly before submitting or note N/A.

| Topic                                          | Item No. | Guide Questions/Description                                                                                                                              | Reported on Page No. |
|------------------------------------------------|----------|----------------------------------------------------------------------------------------------------------------------------------------------------------|----------------------|
| <b>Domain 1: Research team and reflexivity</b> |          |                                                                                                                                                          |                      |
| <i>Personal characteristics</i>                |          |                                                                                                                                                          |                      |
| Interviewer/facilitator                        | 1        | Which author/s conducted the interview or focus group?                                                                                                   |                      |
| Credentials                                    | 2        | What were the researcher's credentials? E.g. PhD, MD                                                                                                     |                      |
| Occupation                                     | 3        | What was their occupation at the time of the study?                                                                                                      |                      |
| Gender                                         | 4        | Was the researcher male or female?                                                                                                                       |                      |
| Experience and training                        | 5        | What experience or training did the researcher have?                                                                                                     |                      |
| <i>Relationship with participants</i>          |          |                                                                                                                                                          |                      |
| Relationship established                       | 6        | Was a relationship established prior to study commencement?                                                                                              |                      |
| Participant knowledge of the interviewer       | 7        | What did the participants know about the researcher? e.g. personal goals, reasons for doing the research                                                 |                      |
| Interviewer characteristics                    | 8        | What characteristics were reported about the interviewer/facilitator? e.g. Bias, assumptions, reasons and interests in the research topic                |                      |
| <b>Domain 2: Study design</b>                  |          |                                                                                                                                                          |                      |
| <i>Theoretical framework</i>                   |          |                                                                                                                                                          |                      |
| Methodological orientation and Theory          | 9        | What methodological orientation was stated to underpin the study? e.g. grounded theory, discourse analysis, ethnography, phenomenology, content analysis |                      |
| <i>Participant selection</i>                   |          |                                                                                                                                                          |                      |
| Sampling                                       | 10       | How were participants selected? e.g. purposive, convenience, consecutive, snowball                                                                       |                      |
| Method of approach                             | 11       | How were participants approached? e.g. face-to-face, telephone, mail, email                                                                              |                      |
| Sample size                                    | 12       | How many participants were in the study?                                                                                                                 |                      |
| Non-participation                              | 13       | How many people refused to participate or dropped out? Reasons?                                                                                          |                      |
| <i>Setting</i>                                 |          |                                                                                                                                                          |                      |
| Setting of data collection                     | 14       | Where was the data collected? e.g. home, clinic, workplace                                                                                               |                      |
| Presence of non-participants                   | 15       | Was anyone else present besides the participants and researchers?                                                                                        |                      |
| Description of sample                          | 16       | What are the important characteristics of the sample? e.g. demographic data, date                                                                        |                      |
| <i>Data collection</i>                         |          |                                                                                                                                                          |                      |
| Interview guide                                | 17       | Were questions, prompts, guides provided by the authors? Was it pilot tested?                                                                            |                      |
| Repeat interviews                              | 18       | Were repeat interviews carried out? If yes, how many?                                                                                                    |                      |
| Audio/visual recording                         | 19       | Did the research use audio or visual recording to collect the data?                                                                                      |                      |
| Field notes                                    | 20       | Were field notes made during and/or after the interview or focus group?                                                                                  |                      |
| Duration                                       | 21       | What was the duration of the interviews or focus group?                                                                                                  |                      |
| Data saturation                                | 22       | Was data saturation discussed?                                                                                                                           |                      |
| Transcripts returned                           | 23       | Were transcripts returned to participants for comment and/or                                                                                             |                      |

| Topic                                  | Item No. | Guide Questions/Description                                                                                                        | Reported on Page No. |
|----------------------------------------|----------|------------------------------------------------------------------------------------------------------------------------------------|----------------------|
|                                        |          | correction?                                                                                                                        |                      |
| <b>Domain 3: analysis and findings</b> |          |                                                                                                                                    |                      |
| <i>Data analysis</i>                   |          |                                                                                                                                    |                      |
| Number of data coders                  | 24       | How many data coders coded the data?                                                                                               |                      |
| Description of the coding tree         | 25       | Did authors provide a description of the coding tree?                                                                              |                      |
| Derivation of themes                   | 26       | Were themes identified in advance or derived from the data?                                                                        |                      |
| Software                               | 27       | What software, if applicable, was used to manage the data?                                                                         |                      |
| Participant checking                   | 28       | Did participants provide feedback on the findings?                                                                                 |                      |
| <i>Reporting</i>                       |          |                                                                                                                                    |                      |
| Quotations presented                   | 29       | Were participant quotations presented to illustrate the themes/findings?<br>Was each quotation identified? e.g. participant number |                      |
| Data and findings consistent           | 30       | Was there consistency between the data presented and the findings?                                                                 |                      |
| Clarity of major themes                | 31       | Were major themes clearly presented in the findings?                                                                               |                      |
| Clarity of minor themes                | 32       | Is there a description of diverse cases or discussion of minor themes?                                                             |                      |

Developed from: Tong A, Sainsbury P, Craig J. Consolidated criteria for reporting qualitative research (COREQ): a 32-item checklist for interviews and focus groups. *International Journal for Quality in Health Care*. 2007. Volume 19, Number 6: pp. 349 – 357

**Once you have completed this checklist, please save a copy and upload it as part of your submission. DO NOT include this checklist as part of the main manuscript document. It must be uploaded as a separate file.**
